# 1 Whole brain imaging reveals distinct spatial patterns of amyloid beta deposition in three mouse 2 models of Alzheimer's disease

3 **Running Title:** Whole brain imaging in mouse models of Alzheimer's disease

4 Jennifer D. Whitesell<sup>1</sup>, Alex R. Buckley<sup>2</sup>, Joseph E. Knox<sup>1</sup>, Leonard Kuan<sup>1</sup>, Nile Graddis<sup>1</sup>, Andrew  
5 Pelos<sup>1,3</sup>, Alice Mukora<sup>1</sup>, Wayne Wakeman<sup>1</sup>, Phillip Bohn<sup>1</sup>, Anh Ho<sup>1</sup>, Karla E. Hirokawa<sup>1</sup>, Julie A. Harris<sup>1\*</sup>  
6 <sup>1</sup>Allen Institute for Brain Science, Seattle WA. <sup>2</sup>Washington University in St. Louis. <sup>3</sup>Pomona College,  
7 Claremont, CA

8 \*Correspondence should be addressed to J.A.H. ([julieha@alleninstitute.org](mailto:julieha@alleninstitute.org))

## 9 **Acknowledgments**

10 We thank Dr. Stefan Mihalas for helpful discussion and advice on statistical methods, Josh Royall for  
11 graphic design work, Dr. Song-Lin Ding for assistance correlating human and mouse anatomical regions,  
12 and the Animal Care, Transgenic Colony Management, Lab Animal Services, and imaging teams for  
13 mouse husbandry, tissue preparation, and imaging. Tg2576 mice were a generous gift from Dr. Xavier  
14 Figueroa at Nativis. Research reported in this publication was supported by the National Institute on  
15 Aging of the National Institutes of Health under Award Number R01AG047589 to J.A.H. The content is  
16 solely the responsibility of the authors and does not necessarily represent the official views of the  
17 National Institutes of Health. We thank the Allen Institute founder, Paul G. Allen, for his vision,  
18 encouragement, and support.

## 19 **Abstract**

20 A variety of Alzheimer's disease (AD) mouse models overexpress mutant forms of human amyloid  
21 precursor protein (APP), producing high levels of amyloid  $\beta$  ( $A\beta$ ) and forming plaques. However, the  
22 degree to which these models mimic spatiotemporal patterns of  $A\beta$  deposition in brains of AD patients is  
23 unknown. Here, we mapped the spatial distribution of  $A\beta$  plaques across ages in three APP-  
24 overexpression mouse lines (APP/PS1, Tg2576, hAPP-J20) using *in vivo* labeling with methoxy-X04, high  
25 throughput whole brain imaging, and an automated informatics pipeline. Images were acquired with high  
26 resolution serial 2-photon tomography and labeled plaques were detected using custom-built  
27 segmentation algorithms. Image series were registered to the Allen Mouse Brain Common Coordinate  
28 Framework, a 3D reference atlas, enabling automated brain-wide quantification of plaque density,  
29 number, and location. In both APP/PS1 and Tg2576 mice, plaques were identified first in isocortex,  
30 followed by olfactory, hippocampal, and cortical subplate areas. In hAPP-J20 mice, plaque density was  
31 highest in hippocampal areas, followed by isocortex, with little to no involvement of olfactory or cortical  
32 subplate areas. Within the major brain divisions, distinct regions were identified with high (or low) plaque  
33 accumulation; e.g., the lateral visual area within the isocortex of APP/PS1 mice had relatively higher  
34 plaque density compared with other cortical areas, while in hAPP-J20 mice, plaques were densest in the  
35 ventral retrosplenial cortex. In summary, we show how whole brain imaging of amyloid pathology in mice  
36 reveals the extent to which a given model recapitulates the regional  $A\beta$  deposition patterns described in  
37 AD.

## 38 **Keywords**

39 Alzheimer's mouse model, Amyloid beta, plaque deposition, whole brain imaging,  
40 RRID:MMRRC\_034832-JAX, RRID:IMSR\_TAC:1349, RRID:MMRRC\_034836-JAX, RRID: AB\_1977025,  
41 RRID: AB\_2535766

## 42 1. Introduction

43 Alzheimer's disease (AD) is classically defined after death by the presence of two neuropathologies,  
44 amyloid  $\beta$  (A $\beta$ ) plaques and tau tangles. Recently, widespread advances in the use of biomarkers as  
45 rigorous measures of these pathologies in living people has led to a coordinated proposal for new  
46 definitions and staging of AD, incorporating biomarker profiles specific for A $\beta$  and tau (Jack et al., 2018).  
47 One major benefit of using biomarkers to define disease stages is the ability to then design experiments  
48 testing novel therapeutics with the goal of intervening at early, presymptomatic stages. This will likely  
49 accelerate translational efforts, but does not replace the need for animal models early in the discovery  
50 and testing process. Thus, an important goal for the preclinical research field is to systematically  
51 characterize whether existing and novel mouse models adequately mimic the distribution and progression  
52 of these pathologies as mapped in human patients.

53 Pathological alterations in A $\beta$  are currently the earliest detectable biomarker change, occurring before  
54 changes in tau pathologies, and sometimes decades before clinical symptoms (Jack et al., 2013). Most  
55 commonly used mouse models were engineered to express mutant forms of the amyloid precursor  
56 protein (APP), and/or presenilin 1 (PS1) which cause early onset forms of AD. These mutant APP mouse  
57 lines develop amyloid pathology, but little to no tau pathology or frank neurodegeneration, suggesting that  
58 they might best model early stages of AD (Sasaguri et al., 2017). Although mouse models have received  
59 much of the blame for the lack of success in translating preclinical research findings to approved  
60 therapeutics for clinical use, one possibility may be that these failures are due to misalignments in the  
61 disease stage modeled by these mice compared to the stage at which interventions are made in the  
62 clinical trials.

63 The large variety, accessibility, and sheer number of Alzheimer's disease mouse models is an immensely  
64 important resource, revealing many novel basic science insights into A $\beta$  pathologies. However,  
65 characterization of these lines with respect to molecular, circuit, network, and cognitive alterations is still  
66 very much incomplete, although at least one good resource based on post-hoc compilation of results  
67 exists (e.g., <https://www.alzforum.org/research-models>). As these data come from many independent labs  
68 using only a single line, often with different experimental focus on selected brain areas, and different  
69 methods and techniques, it is difficult to compare results across lines or interpret reported differences.  
70 Systematic characterization of mouse models, and a centralized database of results, would be a large  
71 asset for the AD community, assisting researchers in selecting the most appropriate lines based on  
72 experimental needs. New large-scale collaborative efforts promise to make progress toward this goal, at  
73 least for newly developed mouse models (e.g., MODEL-AD, <https://model-ad.org/>).

74 Here, our goal was to demonstrate the use of systematic whole brain imaging to characterize key  
75 pathological features in multiple mouse lines. We modified a high-throughput imaging and informatics  
76 pipeline, first developed for our Allen Mouse Connectivity Atlas project (Oh et al., 2014;  
77 <http://connectivity.brain-map.org/projection>), to label and map regional progression patterns of A $\beta$  plaques  
78 across the entire brain in three frequently used APP mouse models: APP/PS1 (Jankowsky et al., 2001),  
79 hAPP-J20 (Mucke et al., 2000) and Tg2576 (Hsiao et al., 1996). Plaques were labeled across the entire  
80 brain via systemic injections of methoxy-X04, a fluorescent Congo red derivative that crosses the blood-  
81 brain barrier (Klunk et al., 2002). Previous reports of plaque density in these AD mouse models report  
82 different ages of onset (Hall & Roberson, 2012; J.-E. Lee & Han, 2013), with numerous reports of plaque  
83 density in cortex and hippocampus (Garcia-Alloza et al., 2006; H. Huang et al., 2016; Jährling et al.,  
84 2015; E. B. Lee et al., 2006; Liu et al., 2017; Mucke et al., 2000; Samaroo et al., 2012; Wright et al., 2013;  
85 Zhang et al., 2017). Some recent studies have reported plaque density for large subdivisions of the cortex  
86 (Kim et al., 2012) or a subset of structures (Liebmann et al., 2016) but they do not comprehensively  
87 describe plaque loads within subregions of these major brain divisions or across the rest of the brain.

88 In humans, progression and regional patterns of amyloid pathology have been described based on  
89 autopsy cases (Thal, Rüb, Orantes, & Braak, 2002), but also more increasingly with amyloid PET imaging  
90 (Buckner, 2005; Grothe et al., 2017; Rice & Bisdas, 2017). From these studies, we know that A $\beta$   
91 deposition occurs selectively first in the cortex, followed by hippocampal regions, including entorhinal and  
92 CA1, then other subcortical regions; e.g., striatum, basal forebrain, thalamus, and finally brainstem nuclei

93 and cerebellum. Within the cortex, A $\beta$  aggregates appear first, and are heaviest, in associational cortical  
94 areas, and specifically in the default mode network (DMN), which includes the precuneus, posterior  
95 cingulate cortex (PCC), retrosplenial cortex (RSP), medial prefrontal cortex, and lateral posterior parietal  
96 cortex (Buckner, Andrews-Hanna, & Schacter, 2008; Raichle et al., 2001).

97 Our results show plaque load is densest and appears earliest in the isocortex in both APP/PS1 and  
98 Tg2576 mice, like the early amyloid phases described by Thal et al., (2002). In contrast, plaque density  
99 was highest in hippocampal areas first, followed by isocortex in hAPP-J20 mice. We also identified  
100 plaques in select subcortical structures, mostly in the APP/PS1 line, in areas homologous to those  
101 described in the later amyloid deposition phases. Within the isocortex, the hAPP-J20 mice appeared to  
102 more closely mimic early stage human AD regional amyloid deposition; plaque load was higher in  
103 associational cortical areas as opposed to sensory and motor regions. Thus, systematic whole brain  
104 imaging of amyloid pathology in mice reveals line-specific regional deposition patterns. These data can  
105 be used together with characterization of other pathologies to identify the most suitable mouse models for  
106 testing early interventions in the progression of Alzheimer's disease.

## 107 **2. Materials and Methods**

108 *Animals.* All experimental procedures related to the use of mice were approved by the Institutional Animal  
109 Care and Use Committee of the Allen Institute for Brain Science, in accordance with NIH guidelines. We  
110 used heterozygous APP<sup>+/-</sup> mice from the following transgenic lines: **APP/PS1** (B6.Cg-  
111 Tg(APP<sup>swe</sup>,PSEN1<sup>dE9</sup>)85Dbo/Mmjax, MMRRC Stock No: 034832-JAX) (Jankowsky et al., 2001),  
112 **hAPP-J20** (B6.Cg-Zbtb20Tg(PDGFB-APP<sup>SwInd</sup>)20Lms/2Mmjax, MMRRC Stock No: 34836-JAX) (Mucke  
113 et al., 2000), **Tg2576** (B6;SJL-Tg(APP<sup>SWE</sup>)2576Kha) (Hsiao et al., 1996). All animals were group-  
114 housed with a 10/14 light cycle (lights on from 6 AM to 8 PM, temperature = 68-72 degrees, humidity =  
115 30-70%). APP/PS1 and hAPP-J20 mice were on the C57Bl/6J background and Tg2576 mice were on an  
116 FVB background. Mice were separated into six groups by age at perfusion: 5 months (P141-P156), 7  
117 months (P202-P218), 9 months (P263-P307), 13 months (P386-P423), 19 months (P529-P589). The  
118 number of mice from each sex in each age group/transgenic line combination is listed in **Table 1**. We only  
119 observed very minor differences between the sexes in one region that had very low plaque density (the  
120 thalamus in hAPP-J20 mice), so we pooled male and female brains for all analyses (however, the two  
121 sexes were not equally distributed in our dataset, see **Table 1**). Our control dataset contained 35  
122 nontransgenic (APP<sup>-/-</sup>) littermates from 7 - 19 months old from the APP/PS1 and hAPP-J20 lines (15  
123 APP/PS1, 20 hAPP-J20; details in **Table 1**). All mice used in this study received a stereotaxic injection of  
124 AAV2/1.pCAG.FLEX.EGFP in the left hemisphere 20-25 days before perfusion; analyses of these data  
125 are not included in the current study. Informatics processing including segmentation and registration were  
126 performed on whole brain images, but all quantification was performed in the right hemisphere to  
127 minimize potential interference from the stereotaxic injection or EGFP fluorescence on plaque  
128 measurements.

129 *Two-photon serial imaging of methoxy-X04 labeled plaques.* To label plaques, mice received an  
130 intraperitoneal (i.p.) injection of 3.3 mg/kg methoxy-X04 in 3.3% DMSO, 6.7% Kolliphor-EL (Millipore  
131 Sigma) in PBS. Twenty to twenty-four hours after injection, mice were perfused with 4%  
132 paraformaldehyde (PFA, 4°C), then brains were dissected and post-fixed in 4% PFA at room temperature  
133 for 3-6 hours, followed by overnight at 4°C. Whole brain fluorescence imaging was performed as  
134 described in (Oh et al., 2014) with serial two-photon (STP) tomography (Ragan et al., 2012; TissueCyte  
135 1000, TissueVision Inc. Somerville, MA), using 925 nm excitation, a 500 nm dichroic mirror, and a 447/60  
136 bandpass emission filter on the blue channel. Serial block-face images were acquired at 0.35  $\mu$ m/pixel  
137 lateral resolution with a 100  $\mu$ m sectioning interval. We acquired 140 serial sections through each brain  
138 from cerebellum through olfactory bulb.

139 *Segmentation and registration.* Automated image segmentation was performed as previously described  
140 (Kuan et al., 2015) with the following modifications. Candidate plaque areas were identified by performing  
141 adaptive thresholding on band-passed blue channel pixel strength in relation to the relative signal  
142 strength in green channel. This additional step was implemented because many artifacts with detectable  
143 blue signal tended to have relatively lower green signals than that of true plaques identified by expert

144 annotation. Since artifacts were more prevalent around tissue borders and in ventricles, the candidate  
145 plaques are then further probabilistically filtered by a simple morphometric classifier which measures and  
146 tests the object shape elongation, spatial location/distance to tissue border, and its relative signal strength  
147 to tissue background autofluorescence in both green and red channels. Thirty-five of one hundred eleven  
148 image series were acquired with a lower photomultiplier tube (PMT) voltage (below 750 V) initially and  
149 were then processed with a higher sensitivity initial classifier.

150 Automated 3D registration was also performed as previously described (Kuan et al., 2015). Briefly,  
151 segmented fluorescence output is a full resolution mask that classifies each  $0.35 \mu\text{m} \times 0.35 \mu\text{m}$  pixel as  
152 either signal or background. An isotropic 3D summary of each brain is constructed by dividing each image  
153 series into  $10 \mu\text{m} \times 10 \mu\text{m} \times 10 \mu\text{m}$  grid voxels. Total signal is computed for each voxel by summing the  
154 number of signal positive pixels in that voxel. Each image stack is registered in a multi-step process using  
155 both global affine and local deformable registration to the 3D Allen Mouse Brain Common Coordinate  
156 Framework, v3 (CCFv3). Plaque density for each structure in the reference atlas ontology was calculated  
157 by summing voxels from the same structure. We also used a standard feature labeling algorithm to obtain  
158 plaque counts within each structure. Adjacent and orthogonally adjacent voxels in the segmentation  
159 signal were grouped together as one plaque object. Due to the  $100 \mu\text{m}$  z-sampling interval, our resolution  
160 limit for detecting separate plaques in the z axis was  $100 \mu\text{m}$ .

161 *Quality Control.* All image series were subjected to manual QC checks for completeness and uniformity of  
162 raw fluorescence images, minimum fluorescence intensity, and artifacts. Severe artifacts such as missing  
163 tissue or sections, poor orientation, edge cutoff, tessellation, and low signal strength caused image series  
164 failure. Brains that contained slices or other damage from the stereotaxic injection, dissection, and  
165 imaging/sectioning process were failed if the damage was in the right hemisphere. APP<sup>-/-</sup> brains did not  
166 undergo additional QC checking beyond the raw image series. For APP<sup>+/-</sup> brains, automatic segmentation  
167 results were checked for overall quality and false positive signals using a two-step process. First, every  
168 image series was manually scored by an expert annotator by overlaying segmentation results for 3-5  
169 single coronal sections with raw fluorescent images from STP imaging. A qualitative score (from 1-7) was  
170 assigned to each image series based on the perceived overlap of the segmentation and raw image and  
171 absence of artifacts. Second, 3D gridded plaque images for every brain were loaded in ITK-SNAP  
172 (Yushkevich et al., 2006) and checked for obvious artifacts at tissue edges. Artifacts identified in 3D  
173 images were subsequently checked by overlaying the corresponding single sections. In some cases,  
174 (~25), the quality control process extended to identification and masking of areas of high intensity/high  
175 frequency artifacts and areas of signal dropout. The edge of the cerebral aqueduct, the cerebellum, and  
176 the medial border of the orbital cortex were particularly prone to bright tissue edge effects (**Figure 2f-k**),  
177 so these regions were manually checked in 1-5 coronal sections and the 3D grid file for every image  
178 series. In some cases, false positives in these regions could not be masked due to overlapping true  
179 positive signal and manual annotators made a judgment call for inclusion based on the overall quality of  
180 the image series. In general, APP<sup>+/-</sup> segmentations were failed for false positives in rostral cortex and  
181 severe false positives in ventricles, but not for minor false positive signal in the ventricles, cerebellum and  
182 olfactory bulb.

183 *Antibody Characterization 6E10* (Covance #B228658, RRID: AB\_1977025, 1:1000) This mouse  
184 monoclonal IgG1 antibody is reactive to amino acid residues 1-16 of human  $\beta$  amyloid, specifically  
185 recognizing the epitope of amino acids 3-8 of the sequence (EFRHDS). This antibody has been  
186 previously shown to label amyloid plaques in the brains of humans (Patton et al., 2006) and all three AD  
187 transgenic mice used in this study (Y. Huang et al., 2015; Pozueta et al., 2013; Thakker et al., 2009). No  
188 staining was observed when the antibody was used to stain tissue from APP<sup>-/-</sup> mice. **Goat Anti-Mouse**  
189 **IgG1(Alexa Fluor® 568)**. This goat polyclonal IgG1 antiserum (Invitrogen #1964384, RRID:  
190 AB\_2535766, 1:1000) is reactive against mouse IgG1. No staining was observed in tissue that was left  
191 unexposed to 6E10 primary antibody but incubated with the IgG1 secondary, for mice of all genotypes.

192 *Immunohistochemistry.* Coronal sections retrieved after two-photon serial imaging ( $100 \mu\text{m}$  thickness)  
193 were immunostained to assess A $\beta$  load and spatial distribution. For antigen retrieval, sections were  
194 placed in 70% formic acid for 15 minutes, followed by a PBS rinse. All sections were then incubated in  
195 blocking solution (4% normal goat serum + 0.5% Triton X-100 in PBS) for 2 hours. After blocking,

196 sections were stained with primary antibody overnight (6E10, Covance, Princeton, NJ, Lot  
197 #B2286581:1000). After three 2-hour washes in PBS + 0.1% Triton X-100, sections were then incubated  
198 in secondary antibody overnight (Alexa Fluor goat anti-mouse 568). After three additional 2-hour washes  
199 in PBS + 0.1% Triton X-100, sections were counterstained with DAPI (Invitrogen, Carlsbad, CA, Lot  
200 #1874814) and coverslipped with Fluoromount G medium (Southern Biotechnology, Birmingham, AL;  
201 catalog #J3017-XE67B). All slides were imaged on the VS120 multichannel epifluorescence microscope  
202 system (Olympus, Center Valley, PA) with a 10X objective. Selected ROIs were subsequently imaged on  
203 the confocal laser scanning system FV3000 (Olympus, Center Valley, PA).

204 *Image Quantification.* To quantify the fraction of methoxy-X04 labeled plaques detected by the automated  
205 segmentation algorithm following STP imaging, we manually counted the number of plaques in 1.4 mm x  
206 1.4 mm ROIs in raw STP coronal images and their associated segmentation mask files (n=15 ROIs total,  
207 3 ROIs per experiment in 5 experiments). All ROIs were drawn in the isocortex and hippocampus in 13-  
208 month-old or 19-month-old brains (n=3 APP/PS1, n=1 Tg2576, n=1 hAPP-J20). We also quantified the  
209 fraction of antibody-labeled plaque area detected by STP imaging and automated segmentation of  
210 methoxy-X04 labeling. We drew ROIs corresponding to major brain divisions on two sections from a  
211 single brain for each mouse line, then applied a threshold to the 6E10 antibody labeling using Fiji (**Figure**  
212 **4c**). The area in the antibody-labeled image and the corresponding segmentation of the STP image were  
213 measured for each ROI, and the fraction detected was quantified as area in segmentation of the STP  
214 image / area in thresholded IHC image. To quantify the ratio of dense core to diffuse plaques, we drew  
215 polygons around the edge of the methoxy-X04 labeling and the A $\beta$  antibody fluorescence in maximum  
216 intensity projections of confocal images (n=6 plaques per brain, 3 cortical and 3 hippocampal) and  
217 measured the area inside each polygon using Fiji (Schindelin et al., 2012). We used sections from one  
218 13-month-old APP/PS1 mouse, one 13-month-old hAPP-J20 mouse, and one 19-month-old Tg2576  
219 mouse.

220 *Statistics.* Previous studies have reported that plaque density is not normally distributed (Liu et al., 2017).  
221 We performed the Shapiro-Wilk test for normality on the 13-month-old APP/PS1 group since it was the  
222 only group of mouse line and age having at least 30 samples (Razali & Wah, 2011). The test rejects the  
223 normality of the brain-wide plaque density distribution with a p-value of 0.001. Therefore, unless  
224 otherwise specified in the text, we used a Kruskal-Wallis one-way ANOVA with a significance level of 0.05  
225 and Wilcoxon rank-sum test for post hoc comparisons for all hypothesis testing herein and we report  
226 plaque densities as median  $\pm$  interquartile range (IQR).

### 227 **3. Results**

228 We measured the brain-wide distribution of plaque pathology in three AD mouse models that express  
229 mutant forms of APP using a high-throughput, high resolution imaging and analysis pipeline (**Figure 1a**).  
230 First, plaques were labeled *in vivo* with i.p. injection of methoxy-X04 one day before transcardial perfusion  
231 (Klunk et al., 2002). Methoxy-X04 crosses the blood brain barrier, labeling amyloid brain-wide and  
232 producing bright fluorescence that is natively detectable; properties critical for use in our STP pipeline  
233 (Amato, Pan, Schwartz, & Ragan, 2016). Methoxy-X04 primarily fluoresces in the blue channel, but, at  
234 least given our acquisition parameters, some signal was also detected in green and red channels. Some  
235 of this signal appears to be autofluorescence, as low, but still detectable, plaque signal was also  
236 observed in APP+/- mice that did not receive a methoxy-X04 injection as has been previously reported  
237 (Diez, Koistinaho, Kahn, Games, & Hökfelt, 2000; Dowson, 1981; Kwan, Duff, Gouras, & Webb, 2009; D  
238 R Thal, Ghebremedhin, Haass, & Schultz, 2002; Zipfel et al., 2003, **Figure 1b**). To establish a time  
239 course for plaque deposition in each transgenic mouse line, methoxy-X04 injections were performed in  
240 multiple age groups between 5 and 19 months (**Table 1**). Second, following plaque labeling, brains were  
241 imaged with serial two-photon tomography (STP) at high x,y resolution (0.35 x 0.35  $\mu$ m) every 100  $\mu$ m  
242 throughout the entire rostral-caudal extent of the brain in coronal planes (**Figure 1b**). Next, each whole  
243 brain image series was processed using the informatics pipeline adapted from (Kuan et al., 2015). This  
244 step consists of two parts; signal detection (segmentation) and registration. We developed a custom-built  
245 signal detection algorithm to automatically segment the methoxy-X04 labeled plaques in each serial  
246 section (**Figure 2**, see methods for details). Segmented image stacks were deformably registered to the  
247 3D Allen Mouse Brain Common Coordinate Framework, v3 (CCFv3) and resampled to 10  $\mu$ m voxel

248 resolution (“3D grid files”). Finally, we quantified plaque density and/or plaque number from the methoxy-  
249 X04 signal and automated segmentation for every region annotated in the Allen CCFv3 reference atlas  
250 across the entire brain.

### 251 **3.1 Evaluation of automated plaque segmentation**

252 The performance of the segmentation algorithm was analyzed in two ways. First, automatic  
253 segmentation results were manually scored for overall quality by an expert annotator (see methods for  
254 details). Second, we compared the number of methoxy-X04 labeled plaques detected by the automated  
255 segmentation algorithm with the number of plaques manually identified on the raw images for a subset of  
256 experiments and regions of interest (ROIs). On average, the automated segmentation algorithm produced  
257 slightly higher plaque counts compared to manual counts (115+/-33%). This discrepancy is likely due in  
258 part to the observation that some brain areas were particularly prone to false positives in the  
259 segmentation, most often caused by bright tissue edges. These artifacts were commonly seen in the  
260 cerebellum, around the edges of ventricles, particularly the cerebral aqueduct (**Figure 2d**), in the rostral  
261 cortex, particularly layer 1 of orbital cortex, and in the glomerular layer of the olfactory bulb where  
262 lipofuscin deposits could not be distinguished from methoxy-X04-labeled plaques. The segmentation and  
263 3D grid files were manually checked for every brain, with particular attention paid to these artifact-prone  
264 areas.

265 Since some regions of the brain were prone to segmentation artifacts, confidence in automatically-  
266 generated quantification of plaque densities is lower for some regions than others. To determine which  
267 regions were the most problematic (and therefore had the lowest confidence), we subjected a set of 35  
268 STP image series from wild type, non-transgenic APP<sup>-/-</sup> littermates with and without methoxy-X04  
269 injections, to the same analysis pipeline as our APP<sup>+/-</sup> brains, *except for the segmentation QC*, so that we  
270 could directly measure the occurrence of artifacts contributing to false positives in our data. Following the  
271 application of the plaque segmentation algorithm to these brains, we quantified the percentage of voxels  
272 containing false positive signal for structures in the isocortex, hippocampus, midbrain, olfactory areas,  
273 and cortical subplate (**Figure 2e-i**). To estimate the magnitude of false positive signals across the whole  
274 brain, we calculated the relative error per structure by subtracting the mean signal in the control dataset  
275 from the mean signal in the full plaque dataset for every structure annotated in the Allen CCFv3 reference  
276 atlas (839 structures). The mean false positive signal for every structure is plotted in **Figure 2j** and  
277 included in **Appendix 1**. Fifty-two percent of structures had an error between -0.1 and 0.1 indicating that  
278 less than 0.1% of their signal was affected by false positives. There was a second, smaller peak in the  
279 histogram around 0.5%, composed of structures that had some false positive signal. Sixteen percent of  
280 structures had more than 0.5% difference between their plaque density and their false positive density,  
281 and no structure had more than a 0.9% difference (**Figure 2j**). Sixteen percent of the 839 structures had  
282 small negative values for the difference between signal and false positive percent coverage, indicating  
283 higher false positives than true plaque signal. However, it is important to note that the control dataset did  
284 not undergo the same segmentation QC process as the plaque dataset, so the reported false positive  
285 values are an upper bound on the error. To make it easier to visualize the anatomical locations of regions  
286 with high false positive signal, we generated a false positive heat map showing the spatial distribution of  
287 regions with high segmentation background (**Figure 2k,l**). Most of these regions are located along the  
288 midline or near ventricles and are subject to false positives from bright tissue edges (arrowheads in  
289 **Figure 1**).

### 290 **3.2 Metrics for quantification of plaque load using methoxy-X04 and comparison to A $\beta$ antibody** 291 **labeling**

292 We explored several features for quantifying plaque pathology. Most frequently, we report plaque density  
293 per structure, defined as the percent of each structure’s total volume that contains segmented plaque  
294 signal. We also calculated plaque counts based on the segmentation results. To accomplish this, we  
295 computationally identified voxels with segmented plaque that were touching and/or diagonally adjacent to  
296 each other in the 3D grid images (**Figure 3**). Our 100  $\mu$ m z-sampling interval caused plaques to have an  
297 elongated appearance along the anterior-posterior axis (**Figure 3c,d**). However, we also identified  
298 individual plaques that extended for several millimeters across serial sections, much further than our

299 sampling interval would explain. This was particularly apparent along the midline where many plaques  
300 appeared to follow the path of the vasculature. This was more obvious in hAPP-J20 and Tg2576 mice  
301 (**Figure 3e, f**) than in APP/PS1 mice (**Figure 3d**), but was observed in all three APP mouse lines.  
302 Because we could not easily differentiate between these extended length vascular-associated plaques  
303 and the non-vascular plaques based on the automated counting results, in most of our subsequent  
304 analyses we report plaque density to describe pathological load. However, the number of plaques per  
305 cubic mm are reported in **Figure 5a** and included in **Appendix 2**, and it should be noted that these values  
306 were not corrected for the presence of vascular-associated plaques.

307 Methoxy-X04, a congo red derivative, was reported to label dense-core amyloid but not diffuse plaques  
308 (Condello, Schain, & Grutzendler, 2011). Thus, we wanted to characterize the relative fraction of *total*  
309 plaque detectable with methoxy-X04 compared to labeling sections with an A $\beta$  antibody. We retrieved  
310 individual sections from a subset of experiments following methoxy-X04 labeling and STP imaging, and  
311 immunostained them with the 6E10 anti-A $\beta$  antibody (**Figure 4a,b**). We quantified the area covered by  
312 plaques in thresholded, antibody-labeled sections compared with the automated segmentation of the  
313 same sections (**Figure 4c**, e.g., compare red to white masks). In all sections, the overall plaque density in  
314 the antibody-labeled sections was higher than the automated segmentation of methoxy-X04 fluorescence,  
315 but the densities for the two methods of plaque labeling differed between mouse lines (APP/PS1:  
316 10.4 $\pm$ 7.8% IHC, 1.2 $\pm$ 0.80% segmentation (13-months); Tg2576: 2.8 $\pm$ 2.5% IHC, 0.44 $\pm$ 0.37%  
317 segmentation (19-months); hAPP-J20: 7.2 $\pm$ 7.2% IHC, 0.08 $\pm$ 0.07% segmentation (13-months)). To more  
318 directly measure our detection level, we calculated the fraction of A $\beta$  antibody-labeled area that was  
319 detected by automatic segmentation of methoxy-X04 fluorescence in the same section for all ROIs in  
320 each image. Surprisingly, we found a significant effect of mouse line on the fraction of antibody-labeled  
321 plaque area detected (**Figure 4f**,  $p=0.04$ , one-way ANOVA). In APP/PS1 and Tg2576 mouse lines, the  
322 fraction detected by segmentation was similar (0.15 $\pm$ 0.10 for APP/PS1, 0.15 $\pm$ 0.11 for Tg2576), but a  
323 lower proportion of antibody labeled plaques were detected in hAPP-J20 (0.03 $\pm$ 0.03,  $p=0.04$  compared to  
324 APP/PS1, Tukey's post hoc comparison). This line-specific difference may be due to the significantly  
325 lower ratio of dense core to diffuse plaque area that we measured in hAPP-J20 mice compared to the  
326 other two lines (APP/PS1: 0.09 $\pm$ 0.04, Tg2576: 0.1 $\pm$ 0.03, hAPP-J20: 0.03 $\pm$ 0.02,  $p=0.001$  one-way  
327 ANOVA, **Figure 4g**). We did not observe any antibody-labeled plaques in regions without methoxy-X04  
328 labeled plaques, and critically, plaque densities measured by both methods are very highly and  
329 significantly correlated for all regions tested in all three mouse lines (Pearson's  $r=0.95$ ,  $p<0.0001$ , **Figure**  
330 **4e**), supporting the use of the methoxy-X04 label in our systematic pipeline approach to describe brain-  
331 wide distribution of plaques. Thus, we find that methoxy-X04 does underestimate total, or absolute,  
332 plaque density (including diffuse plaques) by ~7- to 10-fold for APP/PS1 and Tg2576 mice, and ~30-fold  
333 for hAPP-J20 mice. Due to this difference in the fraction of plaques labeled with methoxy-X04, plus  
334 known differences in the rate of plaque accumulation in each mouse line (Jankowsky & Zheng, 2017), we  
335 focused our analysis on *patterns* of plaque deposition rather than comparing absolute levels between  
336 lines. Where we do compare plaque levels (**Section 3.3**), it is important to note that these reported values  
337 refer only to dense-core, not diffuse, plaques.

### 338 **3.3 Comparison of methoxy-X04-labeled plaque levels between three APP mouse models.**

339 We measured methoxy-X04 labeled plaque density and count for each mouse line across multiple ages in  
340 the whole brain (**Figure 5a,b**). Of the three lines, APP/PS1 mice showed the most aggressive rates of  
341 dense-core plaque accumulation, as expected from previous reports (Garcia-Alloza et al., 2006;  
342 Jankowsky et al., 2004). Whole-brain dense core-plaque densities were significantly higher in APP/PS1  
343 mice compared to the other two mouse lines in every age group, and whole brain plaque counts were  
344 higher in APP/PS1 mice compared to the other two lines for every age except 5 months. At 5 months-old,  
345 plaques were readily observable in APP/PS1 mice. Occasionally, but still quite infrequently, plaques were  
346 detected in 5 and 7-month-old hAPP-J20 mice. At 13 months, hAPP-J20 mice had significantly higher  
347 plaque density than Tg2576 mice (**Figure 5b**,  $p=0.04$ ). Very sporadic plaques were observed in Tg2576  
348 mice at 13 months, and they then accumulated more plaques rapidly between 13 and 19 months.

349 We also measured methoxy-X04-labeled plaque densities within each of the twelve major brain divisions,  
350 and fiber tracts, annotated in the Allen CCFv3 reference atlas. In **Figure 5c,d**, we show plaque density

351 across all age groups for the isocortex (**Figure 5c**) and hippocampal formation (**Figure 5d**). As seen at  
352 the whole brain level, methoxy-X04 labeled dense-core plaque densities in these two major regions were  
353 also higher in APP/PS1 mice compared to Tg2576 or hAPP-J20 mice at every age. Tg2576 and hAPP-  
354 J20 mice did not differ in isocortex plaque density, but hAPP-J20 mice had significantly higher plaque  
355 density in the hippocampal formation compared to Tg2576 mice at 9 and 13-months-old ( $p=0.02$ ,  $p=0.04$ ,  
356 **Figure 5d**).

### 357 **3.4 Temporal and spatial progression patterns of methoxy-X04 labeled plaques in three APP** 358 **mouse models.**

359 Plaque densities across all the major brain divisions are shown for all three mouse lines in 13- and 19-  
360 month-old brains in **Figure 5e-g**. APP/PS1 mice had the highest plaque density in the isocortex but also  
361 had dense plaques in olfactory areas, hippocampal formation, cortical subplate, and cerebellum at both  
362 13- and 19-months-old. At 13 months, APP/PS1 mice were also beginning to show some plaque  
363 accumulation in the thalamus and striatum although the plaque density in these two structures was not  
364 significantly higher than the median for the whole brain at either 13 or 19 months. Tg2576 mice had only  
365 very sporadic plaques at 13 months, but by 19 months-old their plaque distribution across major regions  
366 looked similar to APP/PS1 mice; densest plaques in isocortex, followed by olfactory regions, hippocampal  
367 formation, cortical subplate, and cerebellum. However, even though the plaque distribution was broadly  
368 similar, Tg2576 still had much lower plaque densities than APP/PS1 mice (note the different scales for  
369 the APP/PS1 mouse line plot compared with Tg2576 and hAPP-J20 in **Figures 5e** and **5g**). Although  
370 there was a significant effect of structure on plaque density in major brain divisions in Tg2576 mice  
371 ( $p=10^{-5}$  at 13 months,  $p=0.001$  at 19 months), no individual brain division had a significantly higher plaque  
372 density than the median in post hoc testing. Notably, hAPP-J20 mice had a different brain-wide plaque  
373 distribution from the other two lines. Plaque levels in the isocortex and hippocampal formation were  
374 significantly higher than the whole brain median at 13 months, and plaque density in the cortical subplate  
375 was significantly lower than the median at the same time point (**Figure 5e**). By 19 months, hAPP-J20  
376 mice still had more plaques in the hippocampal formation than any other brain division and there was a  
377 significant effect of structure on plaque density ( $p=0.02$ ), but none of the plaque densities in individual  
378 brain divisions were significantly different from the median at 19-months.

379 To examine the regional distribution of methoxy-X04 labeled plaques at a finer scale, we quantified  
380 densities for each of 316 subdivisions of the 12 major brain regions (aka, “summary structures”) in the  
381 Allen CCFv3. Plaque densities are plotted in **Figure 6** for summary structures in the 4 major brain  
382 divisions with the most plaques (isocortex, hippocampal formation, olfactory areas, and cortical subplate).  
383 Very small summary structures are not shown here (*i.e.*, total volume < 0.5% of its major division), but the  
384 plaque densities for all structures in all mouse lines and age groups are reported in **Appendix 2**.

385 The isocortex is parcellated into 43 regions (or, summary structures) in the Allen CCFv3. We observed  
386 widespread distribution of plaques across these regions in APP/PS1 mice at 13 and 19 months (**Figure**  
387 **6a**). However, there was still some regional specificity within the cortex for this APP line. Plaque densities  
388 in the lateral visual area (VISl) were significantly higher than the median plaque density across the entire  
389 isocortex at 13 months (**Figure 6a,b**). Prefrontal areas prelimbic (PL), infralimbic (ILA), and medial orbital  
390 cortex (ORBm), had lower plaque density compared to the whole isocortex median (**Figure 6a**). hAPP-  
391 J20 mice showed a very striking and specific regional distribution of plaque in the isocortex at both 13 and  
392 19 months, but we only performed statistical testing at 13 months since the isocortex was not identified as  
393 significant with post-hoc testing across all major divisions at 19 months. Plaque density in the isocortex of  
394 13-month-old hAPP-J20 mice was extremely variable, with 23 summary structures having median plaque  
395 densities that were significantly higher or lower than the median for the whole structure (**Figure 6a**).  
396 Specifically, we identified levels that were 5-13 times higher than the median in three subdivisions of  
397 retrosplenial cortex (RSPagl, RSPd, RSPv) at 13 months and 2-4 times higher than the median at 19  
398 months, an observation consistent with previous reports (Harris et al, 2010). Interestingly, plaque density  
399 in RSPd and RSPv was significantly *lower* than the isocortex median for APP/PS1 mice (**Figure 6a,b**). In  
400 addition to RSP subdivisions, hAPP-J20 mice had high plaque density in ventral anterior cingulate cortex  
401 (ACAv), parietal association cortex (anterior visual area, VISa, anteromedial visual area, VISam, and  
402 posteromedial visual area, VISpm), and surprisingly, primary visual cortex (VISp). Tg2576 mice also



403 appeared to have heavier plaque accumulation in dorsal anterior cingulate (ACAd) and parietal (VISam,  
404 VISa, and VISrl) cortex than in other cortical areas at 19 months (**Figure 6a**) but there was no significant  
405 effect of structure on plaque density in isocortex for this mouse line at any age.

406 The hippocampal formation (HPF) contains 14 summary structures (**Figure 6c**), including the  
407 hippocampus itself (CA1, CA3, DG, SUB) as well as associated regions (e.g., entorhinal cortex, ENT).  
408 Within the HPF, structure had a significant effect on plaque density for every mouse line/age group  
409 combination. In the hippocampus proper, all three lines had higher plaque density in the DG than in CA1,  
410 CA2, or CA3 (**Figure 6c,d**). APP/PS1 and Tg2576 mice also had high plaque density in lateral and  
411 medial entorhinal cortex (ENTl and ENTm). hAPP-J20 mice had plaques in ENTm but plaques in ENTl  
412 were rarely observed. All three mouse lines had relatively heavy plaque accumulation in the subiculum  
413 (SUB) and prosubiculum (ProS), but the Tg2576 mouse line had a strong preferential accumulation of  
414 plaques specifically in the dorsal subiculum (**Figure 6d**, white arrow in **Figure 1**). Notably, every single  
415 individual Tg2576 mouse that we imaged had plaques in the dorsal subiculum, even at 9 months-old.

416 Two other brain divisions with differences in plaque density between mouse lines were the olfactory areas  
417 which had dense plaques in many regions for APP/PS1 and Tg2576 mice, but virtually no plaques in  
418 hAPP-J20 mice (**Figure 1**, **Figure 6e,f**) and the cortical subplate which contains several amygdalar  
419 structures, where plaques were similarly high in APP/PS1 and Tg2576 but low or absent in hAPP-J20  
420 mice (**Figure 6g,h**). Importantly, we also did not observe A $\beta$  antibody-labeled plaques in olfactory regions  
421 or the amygdala in hAPP-J20 mice. Also of note, both APP/PS1 and Tg2576 mice had plaques in the  
422 cerebellum, whereas we did not identify any in hAPP-J20 mice (**Figure 7**). APP/PS1 mice developed  
423 cerebellar plaques as early as 4 months-old, but plaques were not observed in the cerebellum of Tg2576  
424 mice until 19 months-old, and then many were associated with vasculature.

425 We also explored the relationship between regional plaque distribution patterns in the isocortex with the  
426 structural connectivity-based isocortical modules found from a network analysis of modeled connectivity  
427 weights in wild type C57BL/6J mice (Harris et al., 2018, Knox et al., 2018). These modules are comprised  
428 of cortical regions that are more strongly connected to each other than to regions in other modules. The  
429 medial and prefrontal modules contain most of the regions reported to be part of the rodent DMN (Lu et  
430 al., 2012; Sforazzini, Schwarz, Galbusera, Bifone, & Gozzi, 2014; Stafford et al., 2014; Zerbi, Grandjean,  
431 Rudin, & Wenderoth, 2015); including RSP, ACA, posterior parietal (PTLp aka VISa and VISrl), ORB, and  
432 PL. The plaque density in each of the six cortical modules for each mouse line compared to the expected  
433 density if plaques were evenly distributed across the entire cortex is plotted in **Figure 8a**. hAPP-J20 mice  
434 had three times as many plaques in the medial module as would be expected with an even distribution  
435 and one and one-half times the expected density in the prefrontal module, indicating a distribution that  
436 overlaps with the rodent DMN. The relative plaque density in the medial module for hAPP-J20 mice was  
437 significantly higher than any other module ( $p < 0.0001$ , 2-way ANOVA with Sidak's multiple comparisons  
438 test), and relative plaque density in the prefrontal module was significantly higher than all other modules  
439 except visual ( $p < 0.0001$  for all other modules,  $p = 0.5$  for visual, 2-way ANOVA with Sidak's multiple  
440 comparisons test). hAPP-J20 mice also had lower plaque density in the anterolateral, somatomotor, and  
441 temporal modules compared to all other modules, but these three modules did not differ from each other.  
442 Tg2576 mice had significantly fewer plaques in the temporal module compared to the prefrontal and  
443 visual modules ( $p = 0.02$ ,  $p = 0.003$ , 2-way ANOVA with Sidak's multiple comparisons test) and APP/PS1  
444 mice had significantly fewer plaques in the medial compared to the visual module ( $p = 0.003$ , 2-way  
445 ANOVA with Sidak's multiple comparisons test). To visualize these differences in plaque distribution  
446 across modules, we created images of the Allen CCFv3 reference atlas structures showing the positions  
447 of the modules with a colormap corresponding to relative plaque levels for each of the three mouse lines  
448 (**Figure 8b**).

449 To assist in visualizing the whole brain, 3D, regional distribution patterns of methoxy-X04 labeled plaques  
450 for the different ages and mouse lines, we created 3D heatmaps (**Figure 9**, **Figure 10**). These maps are  
451 based on the Allen CCFv3 with each annotated brain structure colored by plaque density. **Figures 9 and**  
452 **10** show example images from different 3D locations (coronal, sagittal, and horizontal slices) in 13-month-  
453 old APP/PS1 and hAPP-J20 maps, and 19-month-old Tg2576 maps (since plaque density was very low  
454 at 13 months in this line). **Movie 1** shows a flythrough of these three maps in the coronal plane. Maps for

455 all mouse line/age group combinations are available for download at  
456 <http://download.alleninstitute.org/publications/> and can be viewed in image software such as ITK-SNAP  
457 (<http://www.itksnap.org/>). The data and code for producing plaque maps is also available at  
458 [https://github.com/AllenInstitute/plaque\\_map](https://github.com/AllenInstitute/plaque_map).

459 One spatial feature of amyloid deposition that is easily visualized using the plaque heatmaps is the  
460 distribution of plaques by layer in the isocortex. The high density of plaques in layer 5 for APP/PS1 mice  
461 and layer 1 for Tg2576 mice are prominent features in the 3D maps (i.e. compare **Figure 9b** with **Figure**  
462 **9d**). To quantify differences in plaque density across cortical layers, we calculated the plaque density per  
463 layer across all isocortical structures and compared it to the plaque density that would be expected with  
464 even plaque distribution based on the relative volume of each layer in the Allen CCFv3. The relative  
465 plaque density in each layer for the three mouse lines is plotted in **Figure 11**. Plaque density in APP/PS1  
466 mice was more uniform across layers than the other two lines, but was higher in layer 5 ( $p < 0.0001$  than in  
467 layers 4, 6a, and 6b;  $p = 0.03$  vs. layer 1; 2-way ANOVA with Sidak's multiple comparisons test) (**Figure**  
468 **11a,b**). There appeared to be some regions such as VISrl where plaques were as dense in layer 2/3 as in  
469 layer 5 (**Figure 9b**, **Figure 10b**), and indeed the density in layer 5 was not different from layer 2/3 ( $p = 0.8$ ,  
470 2-way ANOVA with Sidak's multiple comparisons test). In the retrosplenial cortex of hAPP-J20 mice,  
471 plaque density was highest in layer 5 (**Figure 9c**, **Figure 10c**), but in other cortical regions, hAPP-J20  
472 and Tg2576 mice both had the highest plaque density in layer 1 (**Figure 11c-f**, **Figure 9c,d**; **Figure**  
473 **10c,d**). Across all regions, both Tg2576 and hAPP-J20 mice had higher plaque density in layer 1 than in  
474 any other layer ( $p < 0.0001$ , 2-way ANOVA with Sidak's multiple comparisons test). The strong preference  
475 for layer 1 plaques in Tg2576 and hAPP-J20 mice appeared to come partly from the surface vasculature  
476 which had prominent methoxy-X04 labeling in Tg2576 mice at all ages and 19-month-old hAPP-J20 mice  
477 (**Figure 4**). In Tg2576 mice, there was no difference in the relative plaque density between layer 2/3 and  
478 layer 5, but hAPP-J20 mice had significantly higher plaque density in layer 5 than in layer 2/3 across the  
479 whole cortex ( $p = 0.007$ , two-way ANOVA with Sidak's multiple comparisons).

480 In summary, we quantified patterns of plaque deposition across brain regions at the major division and  
481 summary structure level for three APP transgenic mouse lines. We found line-specific differences in  
482 plaque density for different brain divisions and for structures within major brain divisions. The pattern of  
483 plaque deposition in the isocortex differed between mouse lines at both the regional and layer levels.

### 484 **3.5 Comparison of plaque deposition patterns between mouse lines and human**

485 In AD patients, plaque accumulation follows a predictable pattern starting in the isocortex, followed by  
486 hippocampal regions, then other subcortical regions such as striatum, basal forebrain, and thalamus, and  
487 finally brainstem nuclei and cerebellum. These stages of A $\beta$  deposition were described by (Thal, Rüb, et  
488 al., 2002) based on quantifying the percent of human tissue samples with plaques in a list of regions  
489 across the whole brain. To compare the brain-wide patterns of plaque deposition described here with the  
490 pattern of A $\beta$  deposits observed in autopsy tissue from patients in different phases of AD, we examined  
491 plaque density in rodent homologs to the human brain regions used to quantify AD staging in (Thal, Rüb,  
492 et al., 2002). For each region reported to contain A $\beta$  deposits (left column, **Figure 12a**), the closest  
493 mouse homolog from the Allen CCFv3 reference atlas is listed in the second column. In cases where  
494 there was more than one mouse structure that could correspond to the human brain region listed, we  
495 used the median plaque density across all the corresponding structures. We calculated the median  
496 plaque density per structure across ages for each of the three APP mouse lines and, for APP/PS1 and  
497 hAPP-J20 mouse lines, we subtracted the median false positive value for each structure in control mice of  
498 the same line. We applied a color map spanning from the 10<sup>th</sup> to 90<sup>th</sup> percentile of plaque densities for **all**  
499 annotated structures (839) for each group to create a table similar to the one in (Thal, Rüb, et al., 2002)  
500 (**Figure 12a**). The temporal and regional pattern of plaque deposition for APP/PS1 and Tg2576 mice was  
501 remarkably similar to the pattern reported by Thal et al. with a few notable exceptions. Most importantly,  
502 plaques accumulated in the cerebellar cortex (CBX) very early for APP/PS1 mice and were also seen in  
503 Tg2576 mice, but plaques were not regularly seen in the cerebellum (molecular layer or granule cell  
504 layer) until the last phase of A $\beta$  deposition, Phase 5, in human brain tissue. Plaque density was high in  
505 central gray for all three mouse lines and in the substantia nigra for APP/PS1 and hAPP-J20 mouse lines,  
506 but these were both regions in which we observed false positive signal in our automated segmentation,

507 so these values may overestimate the true plaque signal even though we subtracted the control data  
508 values. In the top portion of the chart in **Figure 12a**, the plaque distribution in APP/PS1 mice and Tg2576  
509 mice follows a similar step-wise pattern to that described in autopsy tissue for Phase 1, Phase 2, and the  
510 beginning of Phase 3. The thalamus, hypothalamus, and striatum were key regions that defined Phase 3  
511 for human brains. While APP/PS1 mice began to accumulate plaques in the thalamus and striatum at 13  
512 months, at 19-months-old they did not have plaques in the hypothalamus and still had low plaque density  
513 in the basal forebrain and brainstem nuclei. This implies that even after aging for 1.5 years, APP/PS1  
514 mice, which had the most aggressive plaque deposition of the three tested, only partially resembled  
515 human Phase 3 pathology. Tg2576 and hAPP-J20 mice had low but measurable plaque density in the  
516 thalamus, hypothalamus, and striatum, but we did not observe plaques in these regions so these values  
517 were likely false positives.

518 Counting the number of cases in which plaques were observed in all regions from the table would be  
519 difficult to perform computationally with our data because of the need to choose a threshold for calling a  
520 region “positive” for the presence of plaques. We instead made the assumption that plaque density and  
521 percent prevalence are related, and compared the plaque density values from our quantification with the  
522 percent prevalence values reported in (Thal, Rüb, et al., 2002). To determine which Phase of A $\beta$   
523 deposition was most closely matched by each experimental mouse model, we created a correlation matrix  
524 by calculating the Pearson correlation between the plaque density in all the structures in the table for  
525 each mouse line/age combination and the percent prevalence of plaques in each structure as reported by  
526 (Thal, Rüb, et al., 2002) (**Figure 12c**). For the APP/PS1 mouse line, plaque distribution was most highly  
527 correlated with Phase 2 of A $\beta$  deposition at all ages, but the correlation between Phase 2 and Phase 3  
528 was approximately equal for the 19-month age group confirming that 19-month-old APP/PS1 mice were  
529 transitioning to the equivalent of Phase 3. Thirteen and nineteen-month-old Tg2576 mice also had the  
530 highest correlation with Phase 2. hAPP-J20 mice, however, did not have a high correlation with any of the  
531 phases described in human cases. At 9, 13, and 19-months-old, hAPP-J20 mice had a moderate  
532 correlation with Phase 1 in human tissue (which is defined only by plaques in the neocortex), but this  
533 correlation coefficient was still low (0.5 – 0.59). In the cases used to develop the phasing system,  
534 nondemented patients had A $\beta$  pathology in Phases 1, 2, and 3, while clinically proven A $\beta$  cases exhibited  
535 A $\beta$ -Phases 3, 4, and 5 (Thal, Rüb, et al., 2002). Based on this metric, 19-month-old APP/PS1 and Tg2576  
536 mice most closely resemble patients around the time of first diagnosis.

#### 537 **4. Discussion**

538 We adapted the imaging, automated detection, and registration pipelines previously used for brain-wide  
539 quantification of axonal projections (Oh et al., 2014) to measure whole-brain amyloid pathology in three  
540 commonly used mouse models of AD. Automated segmentation of methoxy-X04 labeled plaques,  
541 combined with the 3D registration of whole brain image series to the Allen CCF volumetric reference atlas  
542 allow us to systematically quantify brain-wide distribution of dense-core plaque pathology at high  
543 resolution for a large sample size. The processing of non-transgenic APP<sup>-/-</sup> littermates with the same  
544 pipeline facilitated interpretation of results by providing a confidence metric for the automated brain-wide  
545 plaque densities reported here. We found that plaque deposition patterns were heterogeneous across  
546 structures in all three transgenic mouse lines examined, pointing to the need for robust whole brain  
547 characterization to optimize the usage of existing and novel mouse models.

548 Comparing estimates of plaque density across different studies and brain regions is challenging, as it  
549 requires considering the labeling method, staining conditions, and imaging conditions used in each study  
550 in addition to animal age and transgenic line. Our pipeline approach provided consistency in labeling  
551 method and imaging conditions, and our use of automatic segmentation ensured consistent detection of  
552 plaque density across many images and samples, allowing us to quantitatively compare plaque density  
553 across the whole brain with unprecedented anatomical specificity. However, quantitatively comparing  
554 results obtained with different methods of plaque labeling is still an important challenge. Here, we found  
555 that a lower fraction of total plaque area was detected with methoxy-X04 in hAPP-J20 mice compared  
556 with APP/PS1 and Tg2576 lines. We measured the magnitude of this difference by comparing  
557 algorithmically-detected methoxy-X04 plaques with antibody labeled plaques in the same sections, but it  
558 is important to note that our automatic segmentation is based on single two-photon section images while

559 the same sections were imaged with a widefield microscope after antibody labeling. However, the ratio  
560 between the two labeling methods would not be expected to differ between mouse lines. Importantly, the  
561 fraction of individual plaque area covered by methoxy-X04 vs. A $\beta$  antibody measured from confocal  
562 sections is similar to the ratio between methoxy-X04 and antibody labeled areas measured in large ROIs  
563 (**Figure 4f,g**), indicating that the difference in detection likely reflects a biological difference in the  
564 composition of plaques for the different mouse lines. To our knowledge, this difference in the ratio of  
565 dense-core/diffuse plaques in hAPP-J20 mice compared with other APP models has not been previously  
566 reported. It will be important to confirm this result using other methods of labeling dense-core and diffuse  
567 plaques. Critically, although our experiments underestimate total plaque density, they do represent brain-  
568 wide plaque location more precisely than any other study to date in mouse models of AD.

569 Despite the challenges in directly comparing results between labs, we did compare our quantified plaque  
570 density values for the isocortex and hippocampus to published measurements when possible to both  
571 establish general trends in our data as compared to others, and to evaluate our automated segmentation  
572 technique. One recent comparable study quantified Thioflavin S-labeled plaque load in the cortex and  
573 hippocampus for both APP/PS1 and Tg2576 mice (Liu et al., 2017). Our measured plaque densities are  
574 on average 35% of those reported by Liu et al. (e.g., for our 13-month-old APP/PS1 mice and Liu et al.'s  
575 10-13-month age group: cortex median = 0.80% vs. 2.1% and hippocampus median = 0.64% vs. 1.4%;  
576 for our 19-month-old Tg2576 and Liu et al.'s 14-17-month age group: cortex median = 0.20% vs. 1.9%  
577 and hippocampal median = 0.19% vs. 0.54%). On the other hand, our plaque densities are slightly higher  
578 than another report (Garcia-Alloza et al., 2006) that also used Thioflavin S labeling to quantify plaque  
579 density in the cortex of APP/PS1 mice (for our 9-month-old age group and Garcia-Alloza et al.'s 10-  
580 month-old age group: cortex median = 0.96 (IQR 0.67-1.8) vs. ~0.13-0.22%). We also report lower  
581 densities (0.2% (7 mo), 0.5% (9 mo) vs. ~2% (7-8.5 mo)) than a group using light sheet microscopy to  
582 image methoxy-X04-labeled plaques in cleared APP/PS1 mouse brains (Jährling et al., 2015). The  
583 plaque density we measured in 9-month-old hAPP-J20 hippocampus is nearly identical to a recent report  
584 using Thioflavin S staining (0.03%, Zhang et al., 2017). Overall, it seems that the densities we measured  
585 are within reported range of previous studies, albeit on the lower end of ranges.

586 Previous studies have reported plaque density in the cortex and hippocampus for different AD mouse  
587 models across ages, but generally regional distribution of plaque burden is not resolved beyond these  
588 broad divisions, much less across the entire brain. Recently, a 3D survey of Alzheimer's pathologies in  
589 transgenic mouse models including APP/PS1 and Tg2576 was reported using the iDISCO clearing  
590 method (Liebmann et al., 2016). The authors imaged plaques brain-wide using tissue clearing followed by  
591 light sheet microscopy and registration of the whole brain images to the Allen CCFv3 reference atlas. The  
592 values reported by Liebmann et al. for plaque count (plaques per mm<sup>3</sup>) are higher than ours by a factor of  
593 ~10, which could potentially reflect the higher axial resolution of light sheet microscopy (2.5  $\mu$ m vs. our  
594 100  $\mu$ m sectioning interval), but may also be caused by our automated detection algorithm merging  
595 individual plaques (see **Figure 4**). Liebmann et al. did not report plaque densities for all structures across  
596 the brain, but the twelve structures with highest plaque burden in APP/PS1 mice in their study generally  
597 agreed with our findings. In the isocortex, they found the highest plaque load in layers 2/3 and 5 of  
598 primary motor cortex (MOp), layers 2/3 and 5 of barrel cortex (SSp-bfd), supplementary somatosensory  
599 cortex (SSs), and dorsal auditory cortex (AUDd). While none of these structures had significantly higher  
600 density compared to the median for the isocortex in our data, all regions were in the top 5% of densities  
601 for both our 13-month-old and 19-month-old mice. Our results were similarly in agreement with the  
602 structures in the hippocampal formation found to have high plaque load (i.e., subiculum, lateral entorhinal  
603 cortex, CA1, and the molecular layer of the dentate gyrus, **Figure 6**). There were, however, notable  
604 differences between our datasets, as Liebmann et al. reported high plaque density in fiber tracts,  
605 specifically in the piriform area and the corpus callosum. While the piriform cortex and corpus callosum  
606 both had measurable plaque densities in our data, neither was particularly high. Liebmann et al. focused  
607 more on individual plaques than on brain-wide plaque distribution, and they also reported variability in the  
608 shape of individual amyloid deposits, including the presence of elongated structures and vascular  
609 deposits.

610 Our method has several advantages over the clearing method used by Liebmann et al. Most importantly,  
611 we collected image data using the STP imaging system that was also used to construct the Allen CCFv3,

612 so the variability in our 3D registration to this reference atlas was as low as is technically possible. Our  
613 sample size is also very high for some groups, increasing confidence in our results. We put a great deal  
614 of effort into developing and validating our custom segmentation algorithm as described in the results,  
615 although we did not similarly optimize our plaque counting algorithm, which could potentially be improved  
616 with future iteration. Finally, we labeled plaques with methoxy-X04 *in vivo*, rather than post-hoc, so  
617 penetration of the plaque label into the tissue was not a concern. Tissue clearing, however, has the  
618 distinct advantage of being amenable to more types of labels, and continues to be further optimized to  
619 best combine antibody labeling and high resolution whole brain imaging methods (like STP and light  
620 sheet microscopy). It will be useful to compare whole brain quantification of A $\beta$  antibody-labeled plaque  
621 density with the methoxy-X04 density reported here, particularly for the hAPP-J20 line since its fraction of  
622 dense-core plaque labeling is lower than the other APP lines.

623 The advent of PiB-PET imaging as a biomarker in AD has been a major breakthrough for the field. Not  
624 only does it allow non-invasive estimation of whole-brain plaque density and deposition patterns in  
625 humans, but patients can also be diagnosed with probable AD much earlier in the disease process and  
626 clinical trials can be more closely controlled based on biomarker measurements (Counts, Ikonomic,  
627 Mercado, Vega, & Mufson, 2017). To best align pre-clinical research in mouse models with human  
628 biomarker data, the same PET imaging methods should be applied to mice. While STP imaging of  
629 methoxy-X04 labeling gives much higher spatial resolution than possible with PET imaging, ideally one  
630 would like to seamlessly move across scales in mice to enable better experimental testing of potential  
631 mechanistic underpinnings of disease pathology that could be extensible to humans. Unfortunately, PiB  
632 does not label A $\beta$  deposits in some mouse models, including both APP/PS1 and Tg2576 (Klunk et al.,  
633 2005; Snellman et al., 2013), but at least one quantitative comparison between amyloid PET and  
634 methoxy-X04 labeling in different mouse lines has been performed (Brendel et al., 2015). The  
635 significance of the differential affinity of imaging probes for various forms of A $\beta$  is still an active area of  
636 research (Schilling et al., 2016).

637 For many years, regional distribution patterns have been studied in relationship to tau pathology and its  
638 progression with disease stage (H Braak & Braak, 1991; Heiko Braak, Alafuzoff, Arzberger, Kretschmar,  
639 & Del Tredici, 2006). Tau progression through brain networks has more recently been interpreted as  
640 prion-like propagation between cells (Lewis & Dickson, 2016). Not to be left behind, there has been  
641 increasing recognition of the occurrence of specific patterns of regional amyloid pathology as well in AD,  
642 starting with the discovery that A $\beta$  plaques preferentially form in regions of the brain that are part of the  
643 resting state default mode network (DMN, R. L. Buckner, 2005). Not only do AD patients have early and  
644 heavy deposition of plaques in the DMN (Mormino et al., 2011; Palmqvist et al., 2017), the activity of this  
645 brain-wide network is also increasingly impaired as disease progresses (Brier et al., 2012; Hafkemeijer,  
646 van der Grond, & Rombouts, 2012; Jones et al., 2015; Mormino et al., 2011). These functional  
647 connectivity deficits related to the DMN are robust enough that they have been proposed as a biomarker  
648 to track disease progress, although several limitations still need to be addressed before this could be  
649 implemented (Jones, 2016). The mechanisms underlying this link between A $\beta$  pathology and functional  
650 impairment of large-scale networks have been elusive at the cellular and behavioral level, where plaque  
651 pathology, neurodegeneration, and cognitive impairment have not been well-correlated (Nelson et al.,  
652 2012). One intriguing hypothesis is centered around the findings that A $\beta$  deposition is related to neuronal  
653 activity (Bero et al., 2011; Cirrito et al., 2008; Kamenetz et al., 2003; Li et al., 2013). A recent study  
654 directly tested this hypothesis in Tg2576 mice by depriving the barrel cortex of sensory input, which  
655 decreased neuronal activity, and measured the effect regional plaque load (Bero et al., 2011). These  
656 authors wisely began their study by quantifying plaque load across cortical areas before using sensory  
657 deprivation to perturb the distribution of plaque levels. An increased focus on brain-wide distribution of  
658 pathology, in addition to pathology levels, should be an important component of ongoing research in  
659 rodent models of AD to best align with data from patients.

660 In AD patients, plaque deposition expands from the DMN and other cortical structures to hippocampus  
661 and subcortical regions. Plaque pathology in the APP transgenic lines tested here mimics these patterns  
662 of regional vulnerability in different ways. hAPP-J20 mice have a cortical plaque distribution pattern that  
663 most resembles the recent characterization of a rodent DMN homolog (Lu et al., 2012; Sforzini et al.,  
664 2014; Stafford et al., 2014; Zerbi et al., 2015). The preferential accumulation of plaques in retrosplenial

665 and prefrontal cortex in these mice suggests that they could be useful for testing models of regional  
666 vulnerability to amyloid deposition in the cortex. In contrast, the brain-wide sequence of plaque deposition  
667 in APP/PS1 and Tg2576 mice is more similar to the pattern seen in patients (Thal, Rüb, et al., 2002),  
668 suggesting these mouse lines may be more appropriate for studies focusing on brain-wide pathology or  
669 disease progression.

670 There are several possible reasons for the differences we observed in spatial patterns of A $\beta$  deposition  
671 between APP-overexpressing transgenic mouse lines. One obvious possibility is the different promoters  
672 driving transgene expression (**Table 1**) and/or their different genomic insertion sites. A recent study found  
673 differences in expression pattern for some AD mouse models using two newly developed antibodies that  
674 can differentiate between mouse and human APP (Höfling et al., 2016). Tg2576 mice were included in  
675 their study but unfortunately APP/PS1 and hAPP-J20 mice were not. However, this approach could be  
676 applied to additional mouse lines to characterize the interaction between APP expression and A $\beta$   
677 deposition. Interpreting the relationship between APP expression and plaque density may be complicated  
678 by the fact that measurements of APP expression patterns are dominated by signal in cell bodies, but  
679 APP levels in axons may be more relevant to plaque deposition. Testing this hypothesis by correlating  
680 APP and plaque levels in the same region or in synaptically connected regions requires quantification of  
681 both APP expression and plaque deposition patterns with high spatial resolution, but this type of study  
682 could potentially reveal interesting mechanistic details of plaque formation.

683 Another possibility for the differences in spatial pattern of A $\beta$  deposition is that each pattern reflects a  
684 separate aspect of cellular and network vulnerability. Selective vulnerability could occur at the regional  
685 level (e.g. from differences in activity across brain regions) or at the cellular level (e.g. from damage to  
686 specific neuronal projection types). Since the time course and type (dense-core vs. diffuse) of A $\beta$   
687 deposition differs across lines, each mouse lines may be susceptible to damage by different mechanisms.  
688 Unraveling the differences between mouse lines and cell types in their vulnerability to AD pathology is a  
689 challenging problem but these experiments have great potential for unlocking mechanisms of network  
690 neurodegeneration.

691 The age- and line-specific average brain-wide plaque maps described here are available for download at  
692 <http://download.alleninstitute.org/publications/> as nearly raw raster data (nrrd) files that can be viewed  
693 with the free software ITK-SNAP (<http://www.itksnap.org/>) or loaded into Python or Matlab (The  
694 MathWorks, Inc.) as 3D arrays. Data and code for generating these maps in matrix or image form is  
695 available at [https://github.com/AllenInstitute/plaque\\_map](https://github.com/AllenInstitute/plaque_map). We encourage researchers to use these maps  
696 for comparing amyloid distribution patterns between these transgenic models and choosing appropriate  
697 brain regions and mouse lines for hypothesis testing. These significant differences in amyloid deposition  
698 patterns between similar transgenic mouse lines underline the importance of careful consideration when  
699 choosing an AD mouse model (Jankowsky & Zheng, 2017) and importantly, indicate that appropriately  
700 chosen APP mouse models can be useful for modeling amyloid related brain-wide network degeneration.

## 701 **Author Contributions**

702 Conceptualization: JAH, JDW. Supervision: JAH, JDW. Data Acquisition: JDW, AP, PB, AH. Data  
703 Curation: JDW, ARB, AM, KEH. Informatics Pipeline Development: LK, NG, WW. Data Analysis: JDW,  
704 ARB, JEK, NG, AP, AM. Visualization: JDW, ARB, AP, AM, KEH. The original draft was written by JDW  
705 and JAH, with input from JEK, LK, AP. All co-authors reviewed the manuscript.

## 706 **8. References**

- 707 Amato, S. P., Pan, F., Schwartz, J., & Ragan, T. M. (2016). Whole Brain Imaging with Serial Two-Photon  
708 Tomography. *Frontiers in Neuroanatomy*, 10, 31. <https://doi.org/10.3389/fnana.2016.00031>
- 709 Bero, A. W., Yan, P., Roh, J. H., Cirrito, J. R., Stewart, F. R., Raichle, M. E., ... Holtzman, D. M. (2011).  
710 Neuronal activity regulates the regional vulnerability to amyloid- $\beta$  deposition. *Nature Neuroscience*,  
711 14(6), 750–756. <https://doi.org/10.1038/nn.2801>
- 712 Braak, H., Alafuzoff, I., Arzberger, T., Kretschmar, H., & Del Tredici, K. (2006). Staging of Alzheimer  
713 disease-associated neurofibrillary pathology using paraffin sections and immunocytochemistry. *Acta*

- 714 *Neuropathologica*, 112(4), 389–404. <https://doi.org/10.1007/s00401-006-0127-z>
- 715 Braak, H., & Braak, E. (1991). Neuropathological staging of Alzheimer-related changes. *Acta*  
716 *Neuropathologica*, 82(4), 239–259. Retrieved from <http://www.ncbi.nlm.nih.gov/pubmed/1759558>
- 717 Brendel, M., Jaworska, A., Griesinger, E., Rötzer, C., Burgold, S., Gildehaus, F.-J., ... Rominger, A.  
718 (2015). Cross-sectional comparison of small animal [18F]-florbetaben amyloid-PET between  
719 transgenic AD mouse models. *PloS One*, 10(2), e0116678.  
720 <https://doi.org/10.1371/journal.pone.0116678>
- 721 Brier, M. R., Thomas, J. B., Snyder, A. Z., Benzinger, T. L., Zhang, D., Raichle, M. E., ... Ances, B. M.  
722 (2012). Loss of Intranetwork and Internetwork Resting State Functional Connections with  
723 Alzheimer's Disease Progression. *Journal of Neuroscience*, 32(26), 8890–8899.  
724 <https://doi.org/10.1523/JNEUROSCI.5698-11.2012>
- 725 Buckner, R. L. (2005). Molecular, Structural, and Functional Characterization of Alzheimer's Disease:  
726 Evidence for a Relationship between Default Activity, Amyloid, and Memory. *Journal of*  
727 *Neuroscience*, 25(34), 7709–7717. <https://doi.org/10.1523/JNEUROSCI.2177-05.2005>
- 728 Buckner, R. L., Andrews-Hanna, J. R., & Schacter, D. L. (2008). The brain's default network: Anatomy,  
729 function, and relevance to disease. *Annals of the New York Academy of Sciences*, 1124, 1–38.  
730 <https://doi.org/10.1196/annals.1440.011>
- 731 Cirrito, J. R., Kang, J.-E., Lee, J., Stewart, F. R., Verges, D. K., Silverio, L. M., ... Holtzman, D. M. (2008).  
732 Endocytosis is required for synaptic activity-dependent release of amyloid-beta in vivo. *Neuron*,  
733 58(1), 42–51. <https://doi.org/10.1016/j.neuron.2008.02.003>
- 734 Condello, C., Schain, A., & Grutzendler, J. (2011). Multicolor time-stamp reveals the dynamics and  
735 toxicity of amyloid deposition. *Scientific Reports*, 1(1), 19. <https://doi.org/10.1038/srep00019>
- 736 Counts, S. E., Ikonovic, M. D., Mercado, N., Vega, I. E., & Mufson, E. J. (2017). Biomarkers for the  
737 Early Detection and Progression of Alzheimer's Disease. *Neurotherapeutics: The Journal of the*  
738 *American Society for Experimental Neurotherapeutics*, 14(1), 35–53.  
739 <https://doi.org/10.1007/s13311-016-0481-z>
- 740 Diez, M., Koistinaho, J., Kahn, K., Games, D., & Hökfelt, T. (2000). Neuropeptides in hippocampus and  
741 cortex in transgenic mice overexpressing V717F  $\beta$ -amyloid precursor protein — initial observations.  
742 *Neuroscience*, 100(2), 259–286. [https://doi.org/10.1016/S0306-4522\(00\)00261-X](https://doi.org/10.1016/S0306-4522(00)00261-X)
- 743 Dowson, J. H. (1981). A sensitive method for the demonstration of senile plaques in the dementing brain.  
744 *Histopathology*, 5(3), 305–310. Retrieved from <http://www.ncbi.nlm.nih.gov/pubmed/7016712>
- 745 Garcia-Alloza, M., Robbins, E. M., Zhang-Nunes, S. X., Purcell, S. M., Betensky, R. A., Raju, S., ...  
746 Frosch, M. P. (2006). Characterization of amyloid deposition in the APP<sup>swe</sup>/PS1<sup>dE9</sup> mouse model  
747 of Alzheimer disease. *Neurobiology of Disease*, 24(3), 516–524.  
748 <https://doi.org/10.1016/j.nbd.2006.08.017>
- 749 Grothe, M. J., Barthel, H., Sepulcre, J., Dyrba, M., Sabri, O., Teipel, S. J., & Alzheimer's Disease  
750 Neuroimaging Initiative, F. the A. D. N. (2017). In vivo staging of regional amyloid deposition.  
751 *Neurology*, 89(20), 2031–2038. <https://doi.org/10.1212/WNL.0000000000004643>
- 752 Hafkemeijer, A., van der Grond, J., & Rombouts, S. A. R. B. (2012). Imaging the default mode network in  
753 aging and dementia. *Biochimica et Biophysica Acta (BBA) - Molecular Basis of Disease*, 1822(3),  
754 431–441. <https://doi.org/10.1016/j.bbadis.2011.07.008>
- 755 Hall, A. M., & Roberson, E. D. (2012). Mouse models of Alzheimer's disease. *Brain Research Bulletin*,  
756 88(1), 3–12. <https://doi.org/10.1016/j.brainresbull.2011.11.017>

- 757 Harris, J. A., Mihalas, S., Hirokawa, K. E., Whitesell, J. D., Knox, J., Bernard, A., ... Zeng, H. (2018). The  
758 organization of intracortical connections by layer and cell class in the mouse brain. *BioRxiv*.  
759 Retrieved from <http://biorxiv.org/content/early/2018/04/18/292961.abstract>
- 760 Höfling, C., Morawski, M., Zeitschel, U., Zanier, E. R., Moschke, K., Serdaroglu, A., ... Kuhn, P.-H.  
761 (2016). Differential transgene expression patterns in Alzheimer mouse models revealed by novel  
762 human amyloid precursor protein-specific antibodies. *Aging Cell*, *15*(5), 953–963.  
763 <https://doi.org/10.1111/accel.12508>
- 764 Hsiao, K., Chapman, P., Nilsen, S., Eckman, C., Harigaya, Y., Younkin, S., ... Cole, G. (1996). Correlative  
765 memory deficits, A $\beta$  elevation, and amyloid plaques in transgenic mice. *Science*.  
766 <https://doi.org/10.1126/science.274.5284.99>
- 767 Huang, H., Nie, S., Cao, M., Marshall, C., Gao, J., Xiao, N., ... Xiao, M. (2016). Characterization of AD-  
768 like phenotype in aged APPSwe/PS1dE9 mice. *Age*, *38*(4), 303–322.  
769 <https://doi.org/10.1007/s11357-016-9929-7>
- 770 Huang, Y., Skwarek-Maruszewska, A., Horré, K., Vandeweyer, E., Wolfs, L., Snellinx, A., ... Thathiah, A.  
771 (2015). Loss of GPR3 reduces the amyloid plaque burden and improves memory in Alzheimer's  
772 disease mouse models. *Science Translational Medicine*, *7*(309), 309ra164-309ra164.  
773 <https://doi.org/10.1126/scitranslmed.aab3492>
- 774 Jack, C. R., Bennett, D. A., Blennow, K., Carrillo, M. C., Dunn, B., Haeberlein, S. B., ... Contributors, R.  
775 (2018). NIA-AA Research Framework: Toward a biological definition of Alzheimer's disease.  
776 *Alzheimer's & Dementia : The Journal of the Alzheimer's Association*, *14*(4), 535–562.  
777 <https://doi.org/10.1016/j.jalz.2018.02.018>
- 778 Jack, C. R., Knopman, D. S., Jagust, W. J., Petersen, R. C., Weiner, M. W., Aisen, P. S., ... Trojanowski,  
779 J. Q. (2013). Tracking pathophysiological processes in Alzheimer's disease: an updated  
780 hypothetical model of dynamic biomarkers. *The Lancet. Neurology*, *12*(2), 207–216.  
781 [https://doi.org/10.1016/S1474-4422\(12\)70291-0](https://doi.org/10.1016/S1474-4422(12)70291-0)
- 782 Jährling, N., Becker, K., Wegenast-Braun, B. M., Grathwohl, S. A., Jucker, M., & Dodt, H.-U. (2015).  
783 Cerebral  $\beta$ -Amyloidosis in Mice Investigated by Ultramicroscopy. *PloS One*, *10*(5), e0125418.  
784 <https://doi.org/10.1371/journal.pone.0125418>
- 785 Jankowsky, J. L., Fadale, D. J., Anderson, J., Xu, G. M., Gonzales, V., Jenkins, N. A., ... Borchelt, D. R.  
786 (2004). Mutant presenilins specifically elevate the levels of the 42 residue ??-amyloid peptide in  
787 vivo: Evidence for augmentation of a 42-specific ?? secretase. *Human Molecular Genetics*, *13*(2),  
788 159–170. <https://doi.org/10.1093/hmg/ddh019>
- 789 Jankowsky, J. L., Slunt, H. H., Ratovitski, T., Jenkins, N. A., Copeland, N. G., & Borchelt, D. R. (2001).  
790 Co-expression of multiple transgenes in mouse CNS: A comparison of strategies. *Biomolecular  
791 Engineering*, *17*(6), 157–165. [https://doi.org/10.1016/S1389-0344\(01\)00067-3](https://doi.org/10.1016/S1389-0344(01)00067-3)
- 792 Jankowsky, J. L., & Zheng, H. (2017). Practical considerations for choosing a mouse model of  
793 Alzheimer's disease. *Molecular Neurodegeneration*, *12*(1), 89. <https://doi.org/10.1186/s13024-017-0231-7>  
794
- 795 Jones, D. T., Knopman, D. S., Gunter, J. L., Graff-radford, J., Vemuri, P., Boeve, B. F., ... Jack, C. R.  
796 (2015). Cascading network failure across the Alzheimer's disease spectrum. *Brain*, 1–16.  
797 <https://doi.org/10.1093/brain/awv338>
- 798 Kamenetz, F., Tomita, T., Hsieh, H., Seabrook, G., Borchelt, D., Iwatsubo, T., ... Malinow, R. (2003). APP  
799 processing and synaptic function. *Neuron*, *37*(6), 925–937. Retrieved from  
800 <http://www.ncbi.nlm.nih.gov/pubmed/12670422>
- 801 Kim, T.-K., Lee, J.-K. J.-Y. J.-E., Park, S.-K., Lee, K.-W., Seo, J.-S., Im, J.-Y., ... Han, P.-L. (2012).



- 802 Analysis of differential plaque depositions in the brains of Tg2576 and Tg-APPswe/PS1dE9  
803 transgenic mouse models of Alzheimer disease. *Experimental & Molecular Medicine*, 44(8), 492–  
804 502. <https://doi.org/10.3858/emm.2012.44.8.056>
- 805 Klunk, W. E., Bacskai, B. J., Mathis, C. A., Kajdasz, S. T., McLellan, M. E., Frosch, M. P., ... Yman, B. R.  
806 T. H. (2002). Imaging A $\beta$  Plaques in Living Transgenic Mice with Multiphoton Microscopy and  
807 Methoxy-X04 , a Systemically Administered Congo Red Derivative. *Journal of Neuropathology &*  
808 *Experimental Neurology*, 61(9), 797–805. <https://doi.org/10.1093/jnen/61.9.797>
- 809 Klunk, W. E., Lopresti, B. J., Ikonovic, M. D., Lefterov, I. M., Koldamova, R. P., Abrahamson, E. E., ...  
810 Mathis, C. A. (2005). Binding of the Positron Emission Tomography Tracer Pittsburgh Compound-B  
811 Reflects the Amount of Amyloid-in Alzheimer's Disease Brain But Not in Transgenic Mouse Brain.  
812 <https://doi.org/10.1523/JNEUROSCI.2990-05.2005>
- 813 Kuan, L., Li, Y., Lau, C., Feng, D., Bernard, A., Sunkin, S. M., ... Ng, L. (2015). Neuroinformatics of the  
814 Allen Mouse Brain Connectivity Atlas. *Methods*, 73, 4–17.  
815 <https://doi.org/10.1016/j.ymeth.2014.12.013>
- 816 Kwan, A. C., Duff, K., Gouras, G. K., & Webb, W. W. (2009). Optical visualization of Alzheimer's  
817 pathology via multiphoton-excited intrinsic fluorescence and second harmonic generation. *Optics*  
818 *Express*, 17(5), 3679–3689. Retrieved from <http://www.ncbi.nlm.nih.gov/pubmed/19259208>
- 819 Lee, E. B., Leng, L. Z., Zhang, B., Kwong, L., Trojanowski, J. Q., Abel, T., & Lee, V. M. Y. (2006).  
820 Targeting amyloid- $\beta$  peptide (A $\beta$ ) oligomers by passive immunization with a conformation-selective  
821 monoclonal antibody improves learning and memory in A $\beta$  precursor protein (APP) transgenic mice.  
822 *Journal of Biological Chemistry*, 281(7), 4292–4299. <https://doi.org/10.1074/jbc.M511018200>
- 823 Lee, J.-E., & Han, P.-L. (2013). An update of animal models of Alzheimer disease with a reevaluation of  
824 plaque depositions. *Experimental Neurobiology*, 22(2), 84–95.  
825 <https://doi.org/10.5607/en.2013.22.2.84>
- 826 Lewis, J., & Dickson, D. W. (2016). Propagation of tau pathology: hypotheses, discoveries, and yet  
827 unresolved questions from experimental and human brain studies. *Acta Neuropathologica*, 131(1),  
828 27–48. <https://doi.org/10.1007/s00401-015-1507-z>
- 829 Li, X., Uemura, K., Hashimoto, T., Nasser-Ghodsi, N., Arimon, M., Lill, C. M., ... Berezovska, O. (2013).  
830 Neuronal activity and secreted amyloid  $\beta$  lead to altered amyloid  $\beta$  precursor protein and presenilin 1  
831 interactions. *Neurobiology of Disease*, 50, 127–134. <https://doi.org/10.1016/j.nbd.2012.10.002>
- 832 Liebmann, T., Renier, N., Bettayeb, K., Greengard, P., Tessier-Lavigne, M., & Flajolet, M. (2016). Three-  
833 Dimensional Study of Alzheimer's Disease Hallmarks Using the iDISCO Clearing Method. *Cell*  
834 *Reports*, 16(4), 1138–1152. <https://doi.org/10.1016/J.CELREP.2016.06.060>
- 835 Liu, P., Reichl, J. H., Rao, E. R., McNellis, B. M., Huang, E. S., Hemmy, L. S., ... Zahs, K. R. (2017).  
836 Quantitative Comparison of Dense-Core Amyloid Plaque Accumulation in Amyloid- $\beta$  Protein  
837 Precursor Transgenic Mice. *Journal of Alzheimer's Disease*, 56(2), 743–761.  
838 <https://doi.org/10.3233/JAD-161027>
- 839 Lu, H., Zou, Q., Gu, H., Raichle, M. E., Stein, E. A., & Yang, Y. (2012). Rat brains also have a default  
840 mode network. *Proc Natl Acad Sci U S A*, 109(10), 3979–3984.  
841 <https://doi.org/10.1073/pnas.1200506109>
- 842 Mormino, E. C., Smiljic, A., Hayenga, A. O., Onami, S. H., Greicius, M. D., Rabinovici, G. D., ... Jagust,  
843 W. J. (2011). Relationships between  $\beta$ -amyloid and functional connectivity in different components  
844 of the default mode network in aging. *Cerebral Cortex (New York, N. Y. : 1991)*, 21(10), 2399–2407.  
845 <https://doi.org/10.1093/cercor/bhr025>

- 846 Mucke, L., Masliah, E., Yu, G. Q., Mallory, M., Rockenstein, E. M., Tatsuno, G., ... McConlogue, L.  
847 (2000). High-level neuronal expression of abeta 1-42 in wild-type human amyloid protein precursor  
848 transgenic mice: synaptotoxicity without plaque formation. *The Journal of Neuroscience : The*  
849 *Official Journal of the Society for Neuroscience*, 20(11), 4050–4058.  
850 <https://doi.org/10.1523/JNEUROSCI.20-11-04050.2000>
- 851 Nelson, P. T., Alafuzoff, I., Bigio, E. H., Bouras, C., Braak, H., Cairns, N. J., ... Beach, T. G. (2012).  
852 Correlation of Alzheimer Disease Neuropathologic Changes With Cognitive Status: A Review of the  
853 Literature. *Journal of Neuropathology & Experimental Neurology*, 71(5), 362–381.  
854 <https://doi.org/10.1097/NEN.0b013e31825018f7>
- 855 Oh, S. W., Harris, J. A., Ng, L., Winslow, B., Cain, N., Mihalas, S., ... Zeng, H. (2014). A mesoscale  
856 connectome of the mouse brain. *Nature*, 508(7495), 207–214. <https://doi.org/10.1038/nature13186>
- 857 Palmqvist, S., Schöll, M., Strandberg, O., Mattsson, N., Stomrud, E., Zetterberg, H., ... Hansson, O.  
858 (2017). Earliest accumulation of  $\beta$ -amyloid occurs within the default-mode network and concurrently  
859 affects brain connectivity. *Nature Communications*, 8(1), 1214. [https://doi.org/10.1038/s41467-017-](https://doi.org/10.1038/s41467-017-01150-x)  
860 01150-x
- 861 Patton, R. L., Kalback, W. M., Esh, C. L., Kokjohn, T. A., Van Vickle, G. D., Luehrs, D. C., ... Roher, A. E.  
862 (2006). Amyloid-beta peptide remnants in AN-1792-immunized Alzheimer's disease patients: a  
863 biochemical analysis. *The American Journal of Pathology*, 169(3), 1048–1063.  
864 <https://doi.org/10.2353/AJPATH.2006.060269>
- 865 Pozueta, J., Lefort, R., Ribe, E. M., Troy, C. M., Arancio, O., & Shelanski, M. (2013). Caspase-2 is  
866 required for dendritic spine and behavioural alterations in J20 APP transgenic mice. *Nature*  
867 *Communications*, 4(1), 1939. <https://doi.org/10.1038/ncomms2927>
- 868 Ragan, T. M., Kadiri, L. R., Venkataraju, K. U., Bahlmann, K., Sutin, J., Taranda, J., ... Osten, P. (2012).  
869 Serial two-photon tomography for automated ex vivo mouse brain imaging. *Nature Methods*, 9(3),  
870 255–258. <https://doi.org/10.1038/nmeth.1854>
- 871 Raichle, M. E., MacLeod, A. M., Snyder, A. Z., Powers, W. J., Gusnard, D. A., & Shulman, G. L. (2001). A  
872 default mode of brain function. *Proceedings of the National Academy of Sciences of the United*  
873 *States of America*, 98(2), 676–682. <https://doi.org/10.1073/pnas.98.2.676>
- 874 Razali, N. M., & Wah, Y. B. (2011). Power comparisons of shapiro-wilk, kolmogorov-smirnov, lilliefors and  
875 anderson-darling tests. *Journal of Statistical Modeling and Analytics*. Retrieved from  
876 [https://www.researchgate.net/profile/Bee\\_Yap/publication/267205556\\_Power\\_Comparisons\\_of\\_Shapiro-](https://www.researchgate.net/profile/Bee_Yap/publication/267205556_Power_Comparisons_of_Shapiro-Wilk_Kolmogorov-Smirnov_Lilliefors_and_Anderson-Darling_Tests/links/5477245b0cf29afed61446e1/Power-Comparisons-of-Shapiro-Wilk-Kolmogorov-Smirnov-Lilliefors-an)  
877 [Wilk\\_Kolmogorov-Smirnov\\_Lilliefors\\_and\\_Anderson-](https://www.researchgate.net/profile/Bee_Yap/publication/267205556_Power_Comparisons_of_Shapiro-Wilk_Kolmogorov-Smirnov_Lilliefors_and_Anderson-Darling_Tests/links/5477245b0cf29afed61446e1/Power-Comparisons-of-Shapiro-Wilk-Kolmogorov-Smirnov-Lilliefors-an)  
878 [Darling\\_Tests/links/5477245b0cf29afed61446e1/Power-Comparisons-of-Shapiro-Wilk-Kolmogorov-](https://www.researchgate.net/profile/Bee_Yap/publication/267205556_Power_Comparisons_of_Shapiro-Wilk_Kolmogorov-Smirnov_Lilliefors_and_Anderson-Darling_Tests/links/5477245b0cf29afed61446e1/Power-Comparisons-of-Shapiro-Wilk-Kolmogorov-Smirnov-Lilliefors-an)  
879 [Smirnov-Lilliefors-an](https://www.researchgate.net/profile/Bee_Yap/publication/267205556_Power_Comparisons_of_Shapiro-Wilk_Kolmogorov-Smirnov_Lilliefors_and_Anderson-Darling_Tests/links/5477245b0cf29afed61446e1/Power-Comparisons-of-Shapiro-Wilk-Kolmogorov-Smirnov-Lilliefors-an)
- 880 Rice, L., & Bisdas, S. (2017). The diagnostic value of FDG and amyloid PET in Alzheimer's disease—A  
881 systematic review. *European Journal of Radiology*, 94, 16–24.  
882 <https://doi.org/10.1016/J.EJRAD.2017.07.014>
- 883 Samaroo, H. D., Opsahl, A. C., Schreiber, J., O'Neill, S. M., Marconi, M., Qian, J., ... Stephenson, D. T.  
884 (2012). High throughput object-based image analysis of  $\beta$ -amyloid plaques in human and transgenic  
885 mouse brain. *Journal of Neuroscience Methods*, 204(1), 179–188.  
886 <https://doi.org/10.1016/J.JNEUMETH.2011.10.003>
- 887 Sasaguri, H., Nilsson, P., Hashimoto, S., Nagata, K., Saito, T., De Strooper, B., ... Saido, T. C. (2017).  
888 APP mouse models for Alzheimer's disease preclinical studies. *The EMBO Journal*, 36(17), 2473–  
889 2487. <https://doi.org/10.15252/embj.201797397>
- 890 Schilling, L. P., Zimmer, E. R., Shin, M., Leuzy, A., Pascoal, T. A., Benedet, A. L., ... Rosa-Neto, P.

- 891 (2016). Imaging Alzheimer's disease pathophysiology with PET. *Dementia & Neuropsychologia*,  
892 10(2), 79–90. <https://doi.org/10.1590/S1980-5764-2016DN1002003>
- 893 Schindelin, J., Arganda-Carreras, I., Frise, E., Kaynig, V., Longair, M., Pietzsch, T., ... Cardona, A.  
894 (2012). Fiji: an open-source platform for biological-image analysis. *Nature Methods*, 9(7), 676–682.  
895 <https://doi.org/10.1038/nmeth.2019>
- 896 Sforazzini, F., Schwarz, A. J., Galbusera, A., Bifone, A., & Gozzi, A. (2014). Distributed BOLD and CBV-  
897 weighted resting-state networks in the mouse brain. *NeuroImage*, 87, 403–415.  
898 <https://doi.org/10.1016/j.neuroimage.2013.09.050>
- 899 Snellman, A., López-Picón, F. R., Rokka, J., Salmona, M., Forloni, G., Scheinin, M., ... Haaparanta-Solin,  
900 M. (2013). Longitudinal amyloid imaging in mouse brain with <sup>11</sup>C-PIB: comparison of APP23,  
901 Tg2576, and APPswe-PS1dE9 mouse models of Alzheimer disease. *Journal of Nuclear Medicine :  
902 Official Publication, Society of Nuclear Medicine*, 54(8), 1434–1441.  
903 <https://doi.org/10.2967/jnumed.112.110163>
- 904 Stafford, J. M., Jarrett, B. R., Miranda-Dominguez, O., Mills, B. D., Cain, N., Mihalas, S., ... Fair, D. A.  
905 (2014). Large-scale topology and the default mode network in the mouse connectome. *Proceedings  
906 of the National Academy of Sciences*, 111(52), 201404346.  
907 <https://doi.org/10.1073/pnas.1404346111>
- 908 Thakker, D. R., Weatherspoon, M. R., Harrison, J., Keene, T. E., Lane, D. S., Kaemmerer, W. F., ...  
909 Shafer, L. L. (2009). Intracerebroventricular amyloid-beta antibodies reduce cerebral amyloid  
910 angiopathy and associated micro-hemorrhages in aged Tg2576 mice. *Proceedings of the National  
911 Academy of Sciences of the United States of America*, 106(11), 4501–4506.  
912 <https://doi.org/10.1073/pnas.0813404106>
- 913 Thal, D. R., Ghebremedhin, E., Haass, C., & Schultz, C. (2002). UV light-induced autofluorescence of full-  
914 length Abeta-protein deposits in the human brain. *Clinical Neuropathology*, 21(1), 35–40. Retrieved  
915 from <http://www.ncbi.nlm.nih.gov/pubmed/11846043>
- 916 Thal, D. R., Rüb, U., Orantes, M., & Braak, H. (2002). Phases of A beta-deposition in the human brain  
917 and its relevance for the development of AD. *Neurology*, 58(12), 1791–1800.  
918 <https://doi.org/10.1212/WNL.58.12.1791>
- 919 Wright, A. L., Zinn, R., Hohensinn, B., Konen, L. M., Beynon, S. B., Tan, R. P., ... Vissel, B. (2013).  
920 Neuroinflammation and Neuronal Loss Precede Aβ Plaque Deposition in the hAPP-J20 Mouse  
921 Model of Alzheimer's Disease. *PLoS ONE*, 8(4), e59586.  
922 <https://doi.org/10.1371/journal.pone.0059586>
- 923 Yushkevich, P. A., Piven, J., Hazlett, H. C., Smith, R. G., Ho, S., Gee, J. C., & Gerig, G. (2006). User-  
924 guided 3D active contour segmentation of anatomical structures: Significantly improved efficiency  
925 and reliability. *NeuroImage*, 31(3), 1116–1128. <https://doi.org/10.1016/j.neuroimage.2006.01.015>
- 926 Zerbi, V., Grandjean, J., Rudin, M., & Wenderoth, N. (2015). Mapping the mouse brain with rs-fMRI: An  
927 optimized pipeline for functional network identification. *NeuroImage*, 123, 11–21.  
928 <https://doi.org/10.1016/j.neuroimage.2015.07.090>
- 929 Zhang, H., Zhang, L., Zhou, D., He, X., Wang, D., Pan, H., ... Sun, B. (2017). Ablating ErbB4 in PV  
930 neurons attenuates synaptic and cognitive deficits in an animal model of Alzheimer's disease.  
931 *Neurobiology of Disease*, 106, 171–180. <https://doi.org/10.1016/J.NBD.2017.07.001>
- 932 Zipfel, W. R., Williams, R. M., Christie, R., Nikitin, A. Y., Hyman, B. T., & Webb, W. W. (2003). Live tissue  
933 intrinsic emission microscopy using multiphoton-excited native fluorescence and second harmonic  
934 generation. *Proceedings of the National Academy of Sciences of the United States of America*,  
935 100(12), 7075–7080. <https://doi.org/10.1073/pnas.0832308100>

936 **Tables**

937 **Table 1. Experimental Dataset**

| <u>Mouse Line</u>              | <u>Promoter</u> | <u>5 mo</u><br><u>(M/F)</u> | <u>7 mo</u><br><u>(M/F)</u> | <u>9 mo</u><br><u>(M/F)</u> | <u>13 mo</u><br><u>(M/F)</u> | <u>19 mo</u><br><u>(M/F)</u> |
|--------------------------------|-----------------|-----------------------------|-----------------------------|-----------------------------|------------------------------|------------------------------|
| APP/PS1 (APP <sup>+/-</sup> )  | moPrP           | 6 (4/2)                     | 13 (9/4)                    | 6 (3/3)                     | 39 (36/3)                    | 9 (7/2)                      |
| hAPP-J20 (APP <sup>+/-</sup> ) | PDGF-β          | 4 (2/2)                     | 3 (2/1)                     | 5 (2/3)                     | 11 (6/5)                     | 3 (0/3)                      |
| Tg2576 (APP <sup>+/-</sup> )   | haPrP           |                             |                             | 3 (0/3)                     | 5 (0/5)                      | 4 (0/4)                      |
| <b>Controls</b>                |                 |                             |                             |                             |                              |                              |
| APP/PS1 (APP <sup>-/-</sup> )  |                 |                             |                             | 2 (2/0)                     | 11 (7/4)                     | 2 (0/2)                      |
| hAPP-J20 (APP <sup>-/-</sup> ) |                 |                             | 2 (1/1)                     |                             | 17 (9/8)                     | 1 (0/1)                      |

938

939 Transgenic mouse lines used in this study and the number of experimental animals in each group.  
 940 Numbers in parentheses indicate the number of males and females in each mouse line/age group  
 941 combination. The promoter used to drive APP expression for each transgenic line is indicated in the table.  
 942 Control mice were APP<sup>-/-</sup> littermates of experimental mice.

943 **Table 2.** Abbreviations and full structure names for all annotated isocortical, hippocampal, cortical  
 944 subplate, and olfactory areas in the Allen Mouse Brain Common Coordinate Framework (CCF) at the  
 945 summary structure level.

| <b>Abbreviation</b> | <b>Full structure name</b>               |
|---------------------|------------------------------------------|
| <b>Isocortex</b>    |                                          |
| FRP                 | Frontal pole, cerebral cortex            |
| MOs                 | Secondary motor area                     |
| ACAd                | Anterior cingulate area, dorsal part     |
| ACAv                | Anterior cingulate area, ventral part    |
| PL                  | Prelimbic area                           |
| ILA                 | Infralimbic area                         |
| ORBI                | Orbital area, lateral part               |
| ORBm                | Orbital area, medial part                |
| ORBvl               | Orbital area, ventrolateral part         |
| Ald                 | Agranular insular area, dorsal part      |
| Alv                 | Agranular insular area, ventral part     |
| Alp                 | Agranular insular area, posterior part   |
| GU                  | Gustatory areas                          |
| VISC                | Visceral area                            |
| SSs                 | Supplemental somatosensory area          |
| SSp-bfd             | Primary somatosensory area, barrel field |
| SSp-tr              | Primary somatosensory area, trunk        |
| SSp-ll              | Primary somatosensory area, lower limb   |
| SSp-ul              | Primary somatosensory area, upper limb   |
| SSp-un              | Primary somatosensory area, unassigned   |
| SSp-n               | Primary somatosensory area, nose         |
| SSp-m               | Primary somatosensory area, mouth        |
| MOp                 | Primary motor area                       |
| VISal               | Anterolateral visual area                |
| VISl                | Lateral visual area                      |
| VISp                | Primary visual area                      |
| VISpl               | Posterolateral visual area               |
| VISli               | Laterointermediate area                  |
| VISpor              | Postrhinal area                          |
| VISrl               | Rostrolateral visual area                |

|                              |                                            |
|------------------------------|--------------------------------------------|
| VISa                         | Anterior area                              |
| VISam                        | Anteromedial visual area                   |
| VISpm                        | posteromedial visual area                  |
| RSPagl                       | Retrosplenial area, lateral agranular part |
| RSPd                         | Retrosplenial area, dorsal part            |
| RSPv                         | Retrosplenial area, ventral part           |
| AUDd                         | Dorsal auditory area                       |
| AUDp                         | Primary auditory area                      |
| AUDpo                        | Posterior auditory area                    |
| AUDv                         | Ventral auditory area                      |
| TEa                          | Temporal association areas                 |
| ECT                          | Ectorhinal area                            |
| <b>Hippocampal Formation</b> |                                            |
| CA1                          | Field CA1                                  |
| CA2                          | Field CA2                                  |
| CA3                          | Field CA3                                  |
| DG                           | Dentate gyrus                              |
| FC                           | Fasciola cinerea                           |
| IG                           | Induseum griseum                           |
| ENTI                         | Entorhinal area, lateral part              |
| ENTm                         | Entorhinal area, medial part, dorsal zone  |
| PAR                          | Parasubiculum                              |
| POST                         | Postsubiculum                              |
| PRE                          | Presubiculum                               |
| SUB                          | Subiculum                                  |
| ProS                         | Prosubiculum                               |
| HATA                         | Hippocampo-amygdalar transition area       |
| APr                          | Area prostriata                            |
| <b>Olfactory Areas</b>       |                                            |
| MOB                          | Main olfactory bulb                        |
| AOB                          | Accessory olfactory bulb                   |
| AON                          | Anterior olfactory nucleus                 |
| TT                           | Taenia tecta                               |
| DP                           | Dorsal peduncular area                     |
| PIR                          | Piriform area                              |
| NLOT                         | Nucleus of the lateral olfactory tract     |
| COAa                         | Cortical amygdalar area, anterior part     |
| COAp                         | Cortical amygdalar area, posterior part    |
| PAA                          | Piriform-amygdalar area                    |
| TR                           | Postpiriform transition area               |
| <b>Cortical Subplate</b>     |                                            |
| CLA                          | Clastrum                                   |
| EPd                          | Endopiriform nucleus, dorsal part          |
| EPv                          | Endopiriform nucleus, ventral part         |
| LA                           | Lateral amygdalar nucleus                  |
| BLA                          | Basolateral amygdalar nucleus              |
| BMA                          | Basomedial amygdalar nucleus               |
| PA                           | Posterior amygdalar nucleus                |

946

947 **Figures and Figure Legends**

Figure 1. Pipeline workflow for labeling and quantification of brain-wide plaque distribution

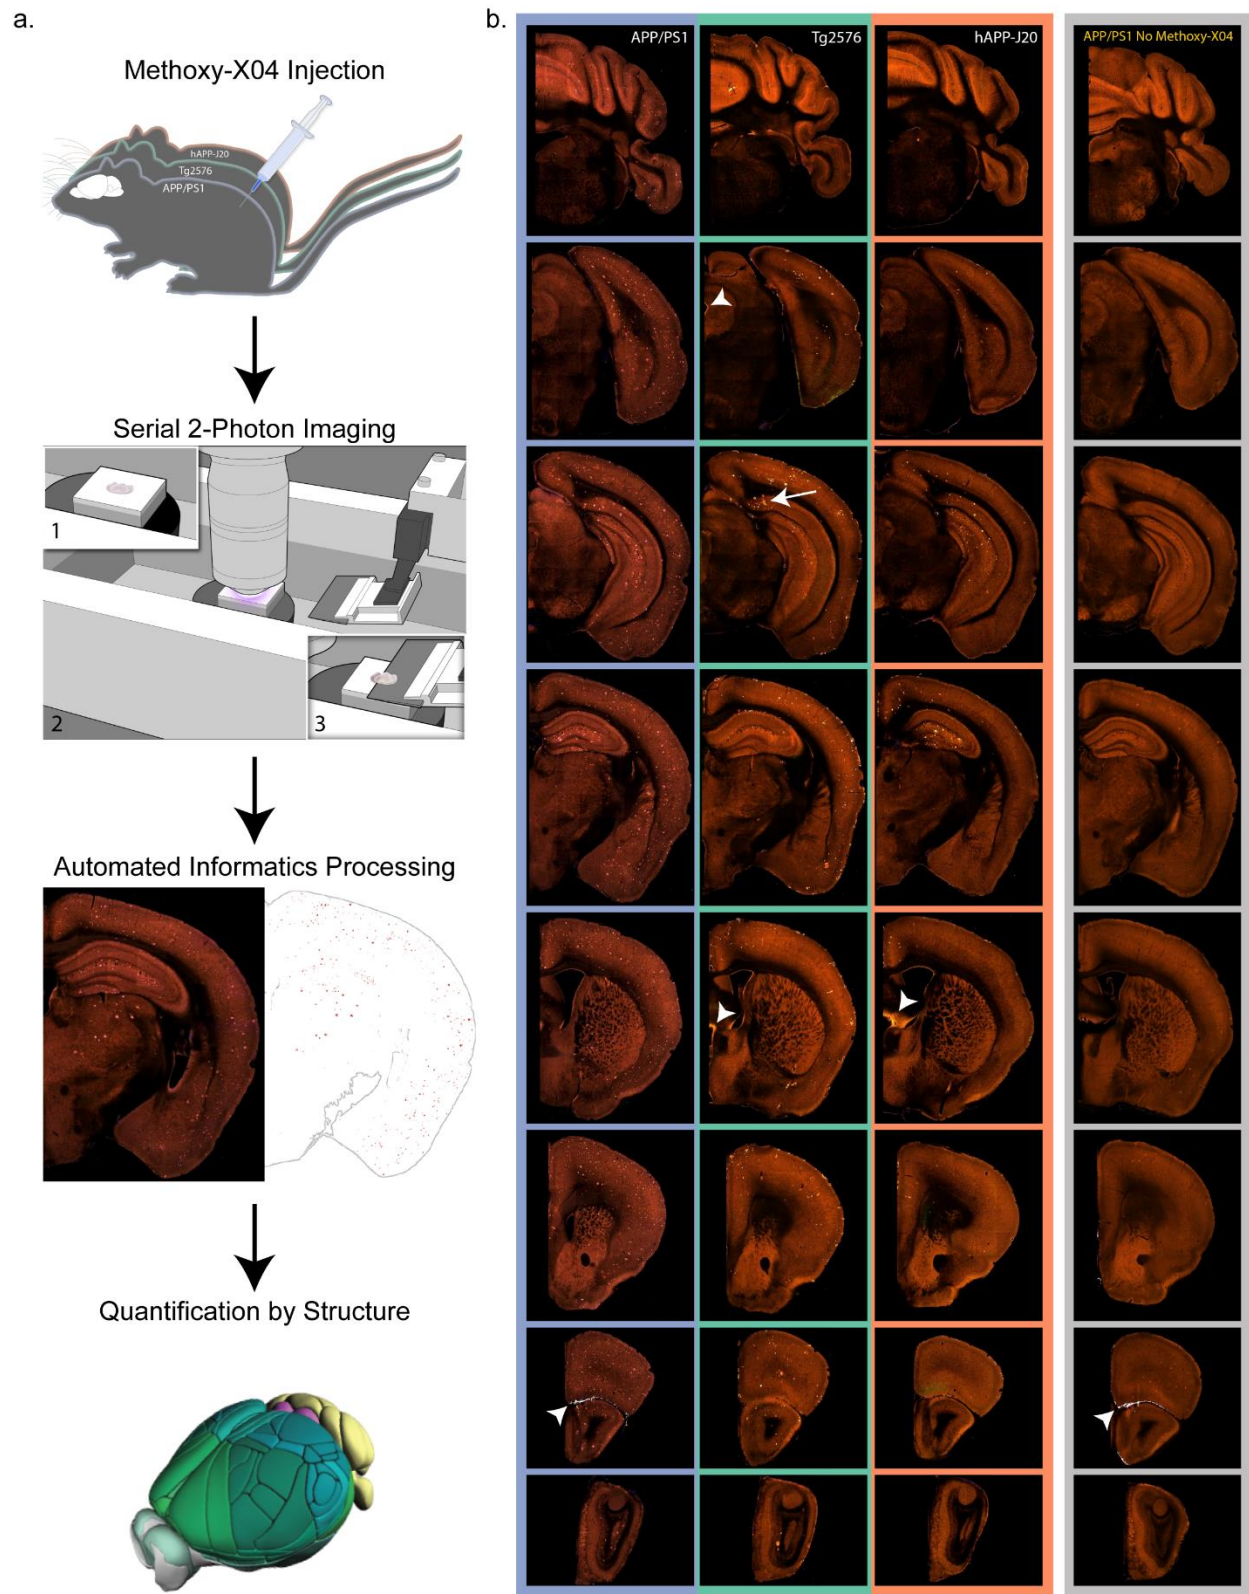

949 **Figure 1. Pipeline workflow for labeling and quantification of brain-wide plaque distribution. (a)**  
950 Mice were injected with methoxy-X04 to label plaques *in vivo* 24 hours before perfusion. Brains were  
951 imaged with serial 2-photon tomography which involves embedding the brain in agar (1), acquisition of 2-  
952 photon images in the coronal plane (2), and sectioning with an integrated vibratome (3). Images were  
953 processed in an automated informatics pipeline that included automated detection of plaques from  
954 section images and deformable 3D registration to the Allen CCFv3. Plaque density and count were then  
955 quantified for all structures. **(b)** Selected images from coronal STP image series spanning the brain from  
956 cerebellum to olfactory bulb are shown for a 19-month-old mouse with methoxy-X04 labeling from each of  
957 the three APP mouse lines used in this study: APP/PS1, Tg2576, and hAPP-J20. Images in the furthest  
958 right column show similar sections from a 6-month-old APP/PS1<sup>+/-</sup> mouse that was not injected with  
959 methoxy-X04. Some lower intensity plaque fluorescence is visible without methoxy-X04 labeling. Arrow  
960 indicates methoxy-X04 labeled plaques in the subiculum of Tg2576 mice. Arrowheads show examples of  
961 bright tissue edges that can cause false positives in automated segmentation.

Figure 2. Automated segmentation of plaque fluorescence

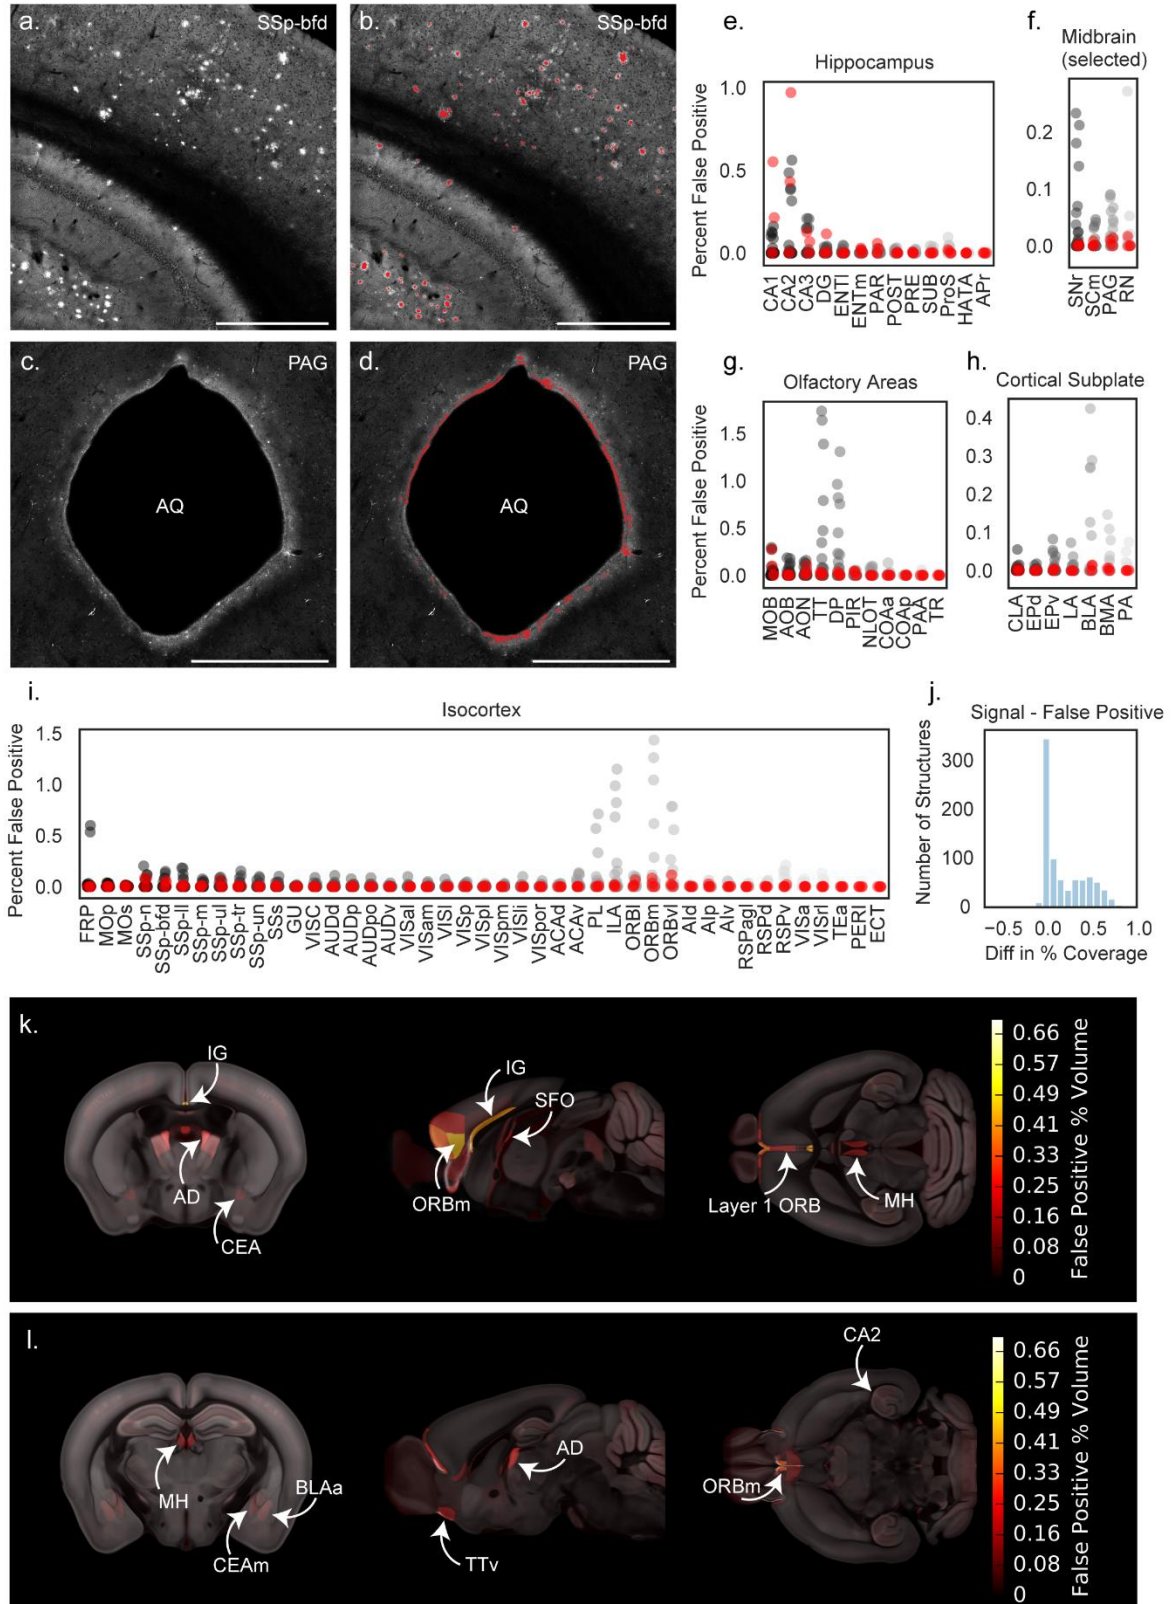



963 **Figure 2. Automated segmentation of plaque fluorescence. (a)** An example ROI from a single section  
964 image in somatosensory cortex, barrel field area (SSp-bfd) showing methoxy-X04 fluorescence. A portion  
965 of the hippocampus is also visible in the bottom left corner of the image. **(b)** Segmented plaque signal  
966 (red) overlaid on the image section shown in (a). **(c)** An ROI from a different section in the same brain  
967 showing the cerebral aqueduct (AQ) and surrounding periaqueductal gray (PAG). **(d)** Segmented plaque  
968 signal for the image section shown in c (red) showing false positive signal along the bright tissue edge at  
969 the border of the cerebral aqueduct. Similar signal was observed in APP<sup>-/-</sup> mice. Scale = 1 mm. **(e-i)**  
970 Quantification of false positives as percent of structure volume for 35 image series collected from APP<sup>-/-</sup>  
971 mice without plaques to identify regions prone to segmentation artifacts. False positives are plotted for  
972 summary structures in hippocampus **(e)**, selected midbrain regions including PAG **(f)**, olfactory areas **(g)**,  
973 cortical subplate **(h)**, and isocortex **(i)**. Red points indicate APP<sup>-/-</sup> mice that received a methoxy-X04  
974 injection one day before perfusion. Abbreviations for summary structures in isocortex, hippocampus,  
975 olfactory areas, and cortical subplate can be found in **Table 2**. Abbreviations in (f) SNr: Substantia nigra,  
976 reticular part; SCm: Superior colliculus, motor related; PAG: Periaqueductal gray; RN: Red nucleus. **(j)**  
977 Histogram showing the difference between signal and false positive levels (% coverage in APP<sup>+/-</sup> mice - %  
978 coverage in APP<sup>-/-</sup> mice) for every structure in the Allen CCFv3 reference atlas. **(k)** False positive  
979 heatmap showing regions with the highest segmentation artifacts. Abbreviations: BLAa: Basolateral  
980 amygdalar nucleus, anterior part; IG: Induseum griseum; AD: Anterodorsal nucleus of the thalamus; CEA:  
981 Central amygdalar nucleus; ORBm: Medial orbital cortex; SFO: Subfornical organ; MH: Medial habenula.  
982 **(l)** False positive heatmap for a different anatomical location. Abbreviations: CEAm: Central amygdalar  
983 nucleus, medial part; TTv: Taenia tecta, ventral part; CA2: Hippocampal field CA2.

Figure 3. Automatic plaque counts reveal large, vascular-associated amyloid deposits.

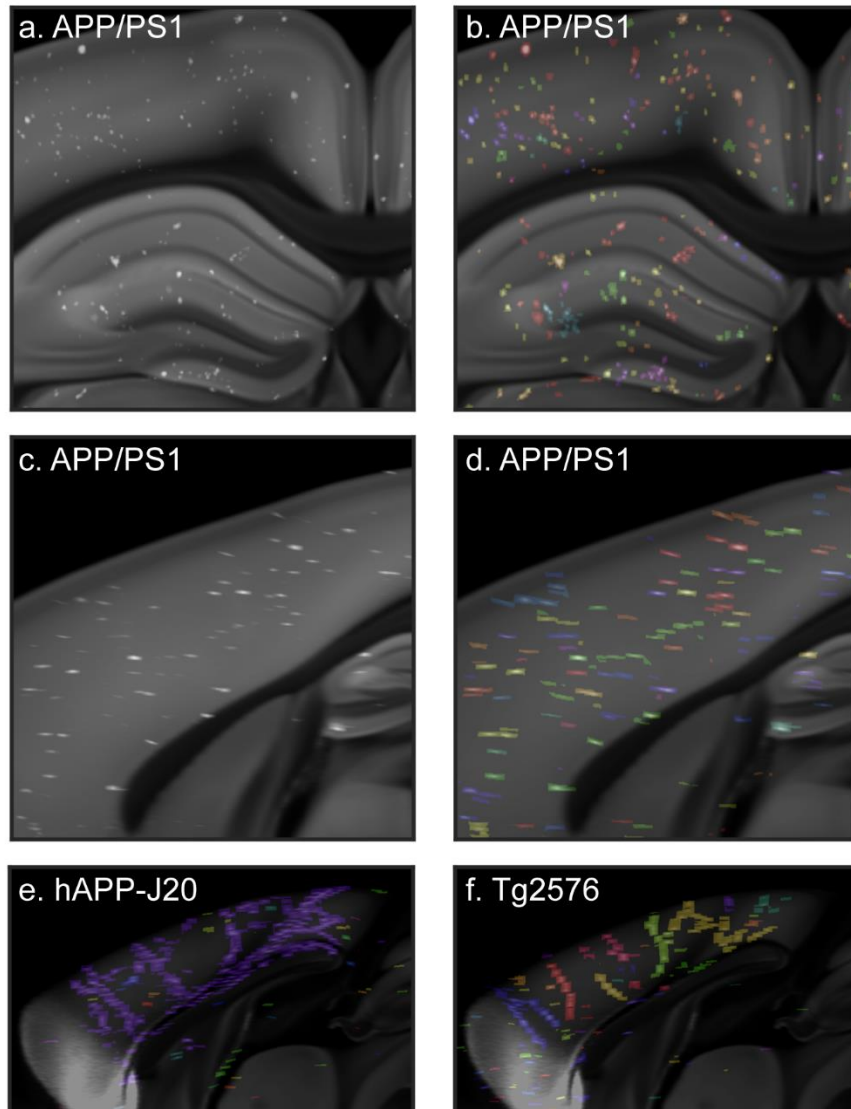

984

985 **Figure 3. Automatic plaque counts reveal large, vascular-associated amyloid deposits.** Portion of a  
986 single coronal (a,b) and sagittal (c,d) image from the CCFv3 template with gridded, automatically  
987 detected methoxy-X04 labeled plaques from a 19-month-old APP/PS1 mouse brain overlaid in white. In  
988 (b) and (d), the same images are shown with automatically counted plaques in labeled with different  
989 colors. Plaques in the same area that are the same color had diagonally adjacent voxels in at least one  
990 image section and were counted as one single object. The sagittal view in (d) shows that plaques are  
991 elongated on the z-axis. (e) Sagittal view from the CCFv3 template with gridded plaques from a 19-  
992 month-old hAPP-J20 mouse with automatic plaque count results overlaid. Nearly all of the plaques along  
993 the midline in this brain were counted as a single plaque (blue). (f) Sagittal CCFv3 template image with  
994 gridded plaques and counts overlaid for a 19-month-old Tg2576 mouse reveals large, vascular-  
995 associated deposits.

Figure 4. Methoxy-X04 accurately labels the location of plaques but underestimates plaque density

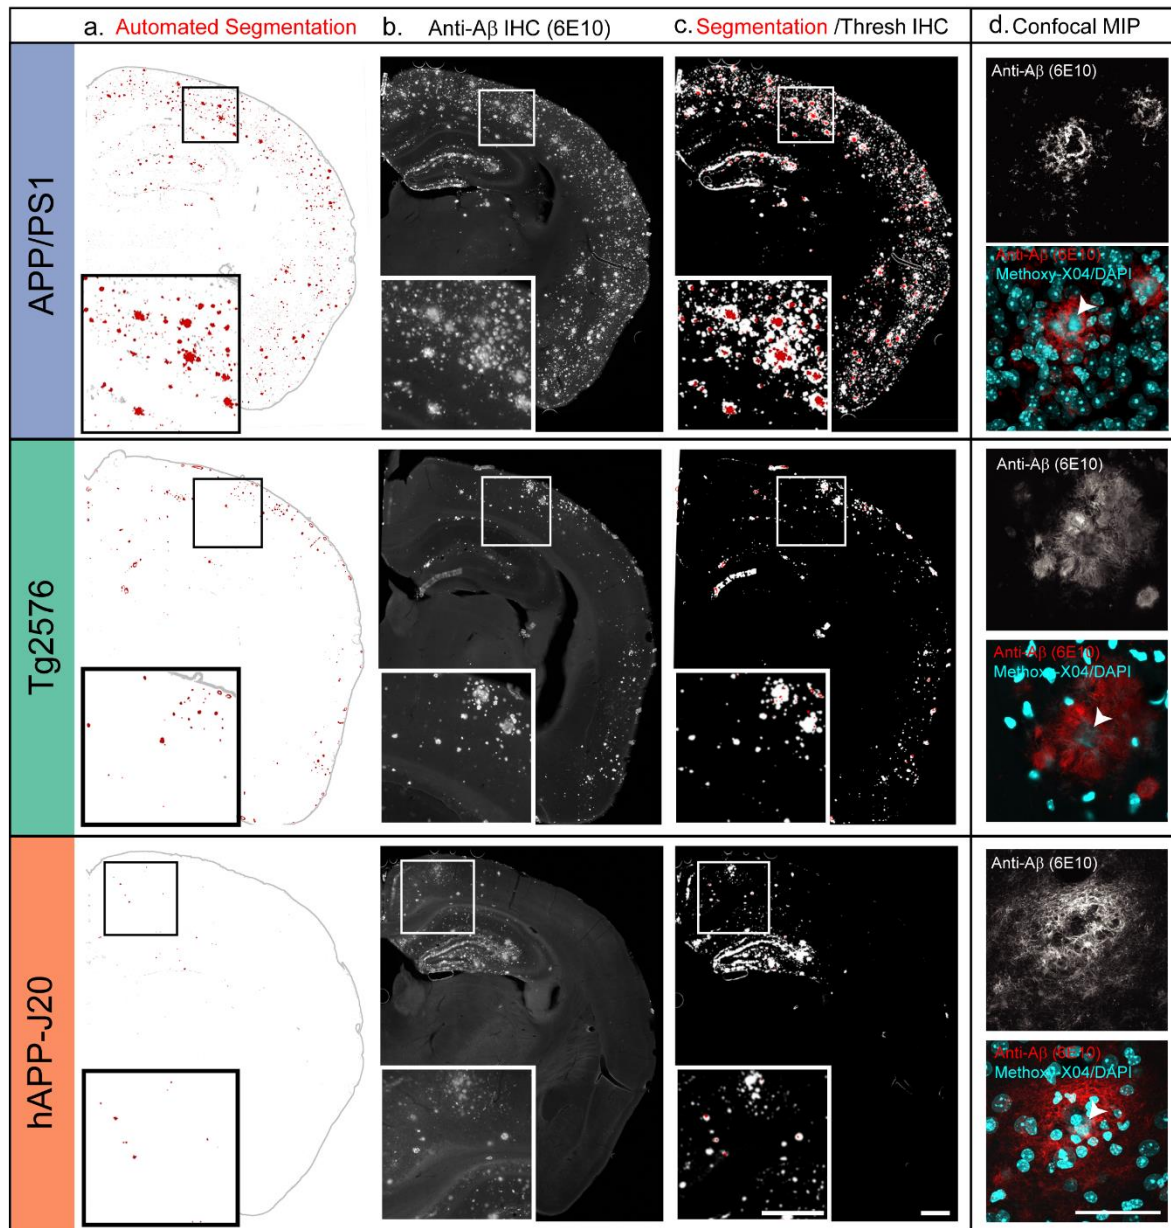

e. Segmented methoxy-X04 plaque density is correlated with antibody-labeled plaque density

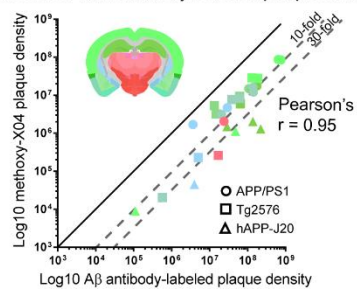

f. Fraction of antibody-stained area detected with automated segmentation

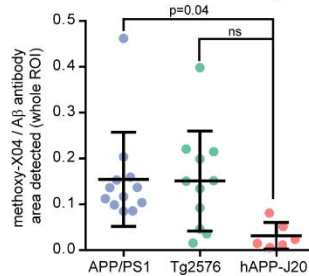

g. Ratio of dense core / diffuse plaques for each APP mouse line

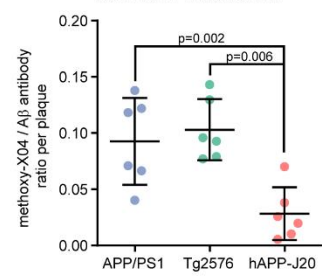

996

997

998 **Figure 4. Methoxy-X04 accurately labels the location of plaques but underestimates plaque**  
999 **density. (a-c)** Automated segmentation results **(a)**, IHC for A $\beta$  (6E10 antibody) **(b)**, and an overlay of the  
1000 automated segmentation and thresholded IHC image from the same section **(c)** are shown for one  
1001 section from each mouse line. APP/PS1 and hAPP-J20 brains are from 13-month-old mice. The Tg2576  
1002 brain is from a 19-month-old mouse. In the segmentation images in **(a)**, red indicates segmented plaques,  
1003 and gray the putative plaque signal that was removed by the adaptive filtering step in the segmentation  
1004 algorithm. Automatically detected tissue edges are also colored gray. Image alignment in the overlay  
1005 images **(c)** is imperfect due to tissue deformation during antibody labeling. **(d)** maximum intensity  
1006 projection of a confocal image stack through the center of one plaque for each mouse line. Upper  
1007 grayscale image shows 6E10 labeling; bottom color image shows 6E10 labeling overlaid with methoxy-  
1008 X04 and DAPI fluorescence (both in cyan). Arrowheads indicate the methoxy-X04 positive core of each  
1009 plaque. Scale = 500  $\mu$ m (a-c), 50  $\mu$ m (d). **(e)** A $\beta$  antibody-labeled plaque density and segmented  
1010 methoxy-X04-labeled plaque density plotted for each ROI measured (log scale). Points are colored by the  
1011 Allen CCFv3 reference atlas region in which each ROI was drawn (isocortex, hippocampal formation,  
1012 cortical subplate, olfactory areas, striatum, and thalamus). Inset shows a coronal section from the Allen  
1013 CCFv3 Reference Atlas with region colors. The shape of each point indicates which mouse line it belongs  
1014 to: circles for APP/PS1, squares for Tg2576, and triangles for hAPP-J20. Methoxy-X04 density was lower  
1015 than A $\beta$  antibody-labeled density for every point, but the two measurements were highly correlated  
1016 (Pearson's  $r = 0.95$ ,  $p < 0.0001$ ). **(f)** The fraction of A $\beta$  antibody-labeled plaque density that was detected  
1017 by automated segmentation was significantly lower for hAPP-J20 mice compared to APP/PS1 mice. **(g)**  
1018 For individual plaques, the ratio of methoxy-X04 labeling to A $\beta$  antibody labeling is plotted for each mouse  
1019 line. hAPP-J20 mice had significantly lower fractions of methoxy-X04/A $\beta$  antibody labeling.

Figure 5. Automated quantification of methoxy-X04-labeled plaque density and count across whole brain and major divisions for three APP mouse lines at various ages.

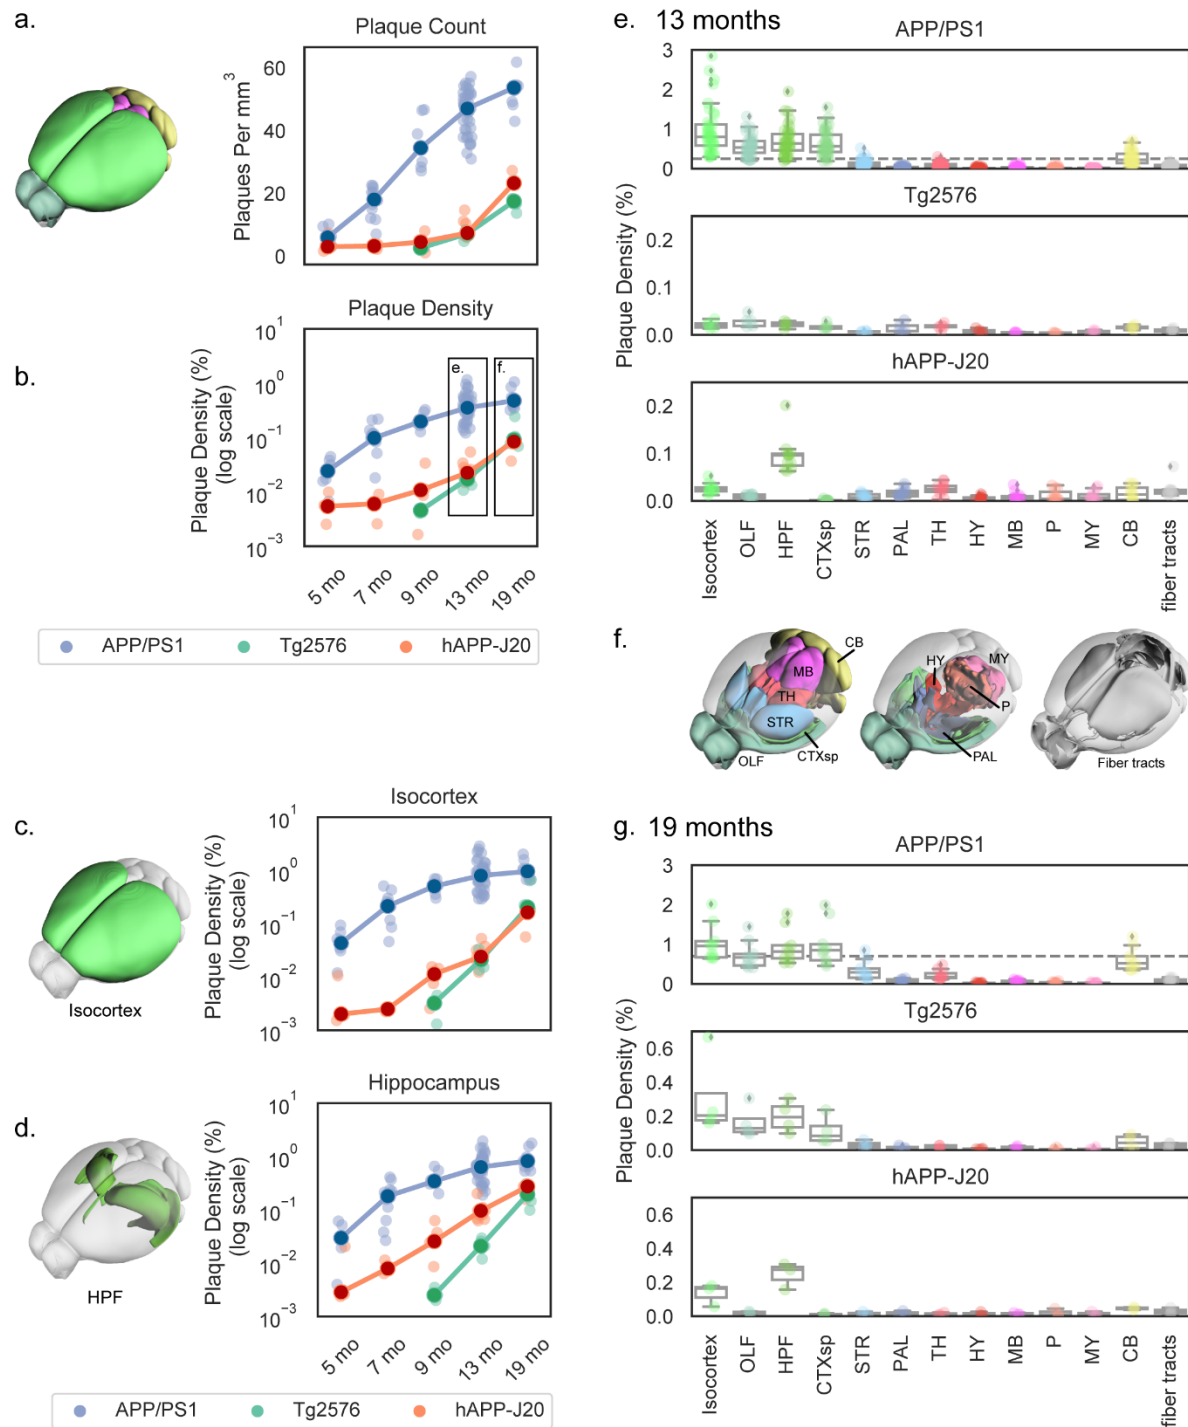

1020  
1021  
1022  
1023  
1024  
1025

**Figure 5. Automated quantification of methoxy-X04-labeled plaque density and count across whole brain and major divisions for three APP mouse lines at various ages.** (a,b) Plaque density measured by automated segmentation and registration plotted as count (plaques per mm<sup>3</sup>; a) or density (% of structure volume; b-g). Plaque density is plotted by age for the whole brain (a,b), isocortex (c), and hippocampal formation (d) in each of the three APP lines characterized. Dark circles indicate the median

1026 values and light points individual animals. Lines connect points at the median. Plaque density at 13  
1027 months **(e)** and 19 months **(g)** divided by major brain division is plotted separately for each mouse line.  
1028 Box plots show the median and IQR, with whiskers extending to 1.5 times the IQR. Outliers are plotted as  
1029 individual points beyond the whiskers. Dashed vertical line in the APP/PS1 plots in (e) and (g) show the  
1030 maximum value from the hAPP-J20 and Tg2576 mouse line plots below at the same age. Plots in (e) and  
1031 (g) are colored by major brain division, and the cartoons in (c), (d), and (f) show the anatomical locations  
1032 of the major brain divisions in the Allen CCFv3 reference atlas. Abbreviations: OLF: Olfactory areas, HPF:  
1033 Hippocampal formation, CTXsp: Cortical subplate, STR: Striatum, PAL: Pallidum, TH: Thalamus, HY:  
1034 Hypothalamus, MB: Midbrain, P: Pons, MY: Medulla, CB: Cerebellum.

Figure 6. Quantification of plaque density for selected summary structures in the isocortex, hippocampus, olfactory areas, and cortical subplate.

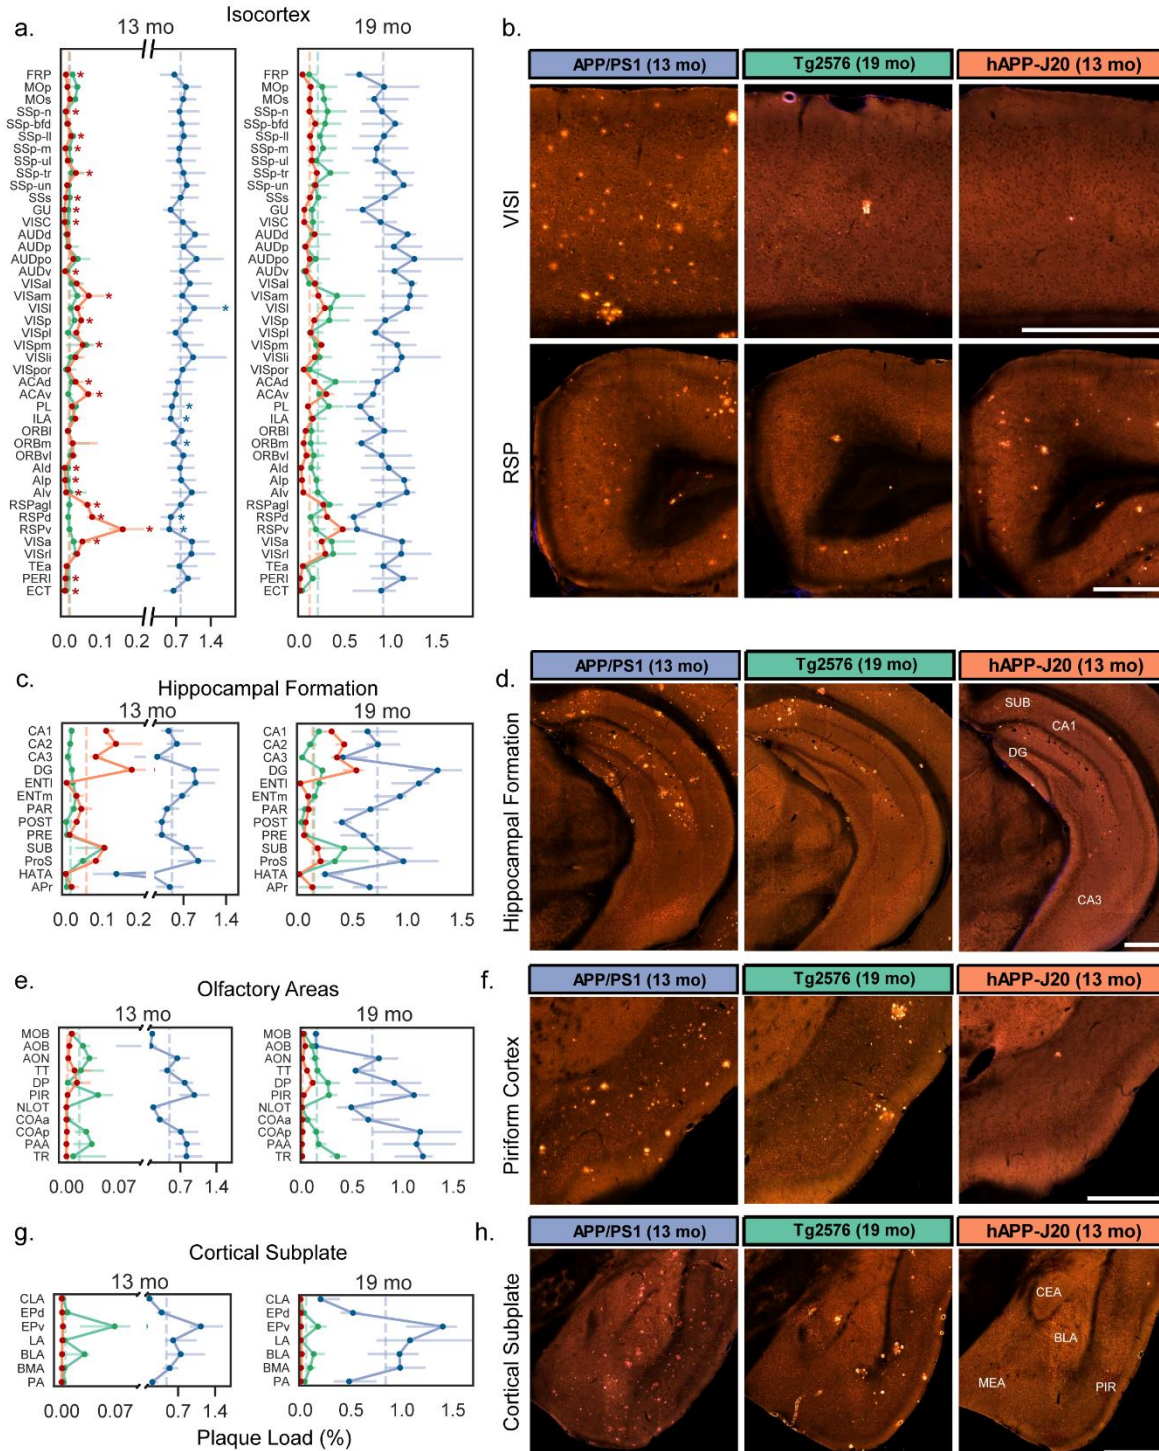

1035

1036

1037

1038

1039

1040

**Figure 6. Quantification of plaque density for selected summary structures in the isocortex, hippocampus, olfactory areas, and cortical subplate.** Plaque density (percent of structure volume) for summary structures in (a) isocortex, (c) hippocampal formation, (e) olfactory areas, and (g) cortical subplate in 13-month-old (left) and 19-month-old (right) mice. Darker lines connect points at the median and lighter error bars indicate the interquartile range. Dashed vertical lines indicate the median value for

1041 each mouse line for all graphed structures in each plot. Plots for plaque density at 13 months have split y-  
1042 axes to allow all three datasets to be plotted on one graph. Asterisks in (a) indicate structures that were  
1043 significantly higher or lower than the median plaque density in isocortex for APP/PS1 and hAPP-J20  
1044 mice. (b) Representative images showing plaque deposition patterns in each of the three APP mouse  
1045 lines for two isocortex structures: lateral visual cortex (VISl, top) and retrosplenial cortex (RSP, bottom).  
1046 (d) Images showing plaque deposition patterns in the hippocampus proper for the three mouse lines. The  
1047 location of subiculum (SUB), CA1, CA3, and dentate gyrus (DG) are indicated on the hAPP-J20 image. (f)  
1048 Images showing plaque deposition patterns in the piriform (olfactory) cortex for the three mouse lines.  
1049 The hAPP-J20 image shows one of only a few plaques observed in this region in hAPP-J20 mice. (h)  
1050 Images showing plaque deposition patterns in different amygdalar structures in the cortical subplate for  
1051 the three mouse lines. The approximate location of the central amygdala (CEA), medial amygdala (MEA),  
1052 basolateral amygdala (BLA), and piriform cortex (PIR) is indicated on the hAPP-J20 image. All  
1053 abbreviations used in the graphs can be found in **Table 2**. Scale = 500  $\mu$ m.

**Figure 7. APP/PS1 and Tg2576 mice have plaques in the cerebellum but hAPP-J20 mice do not.**

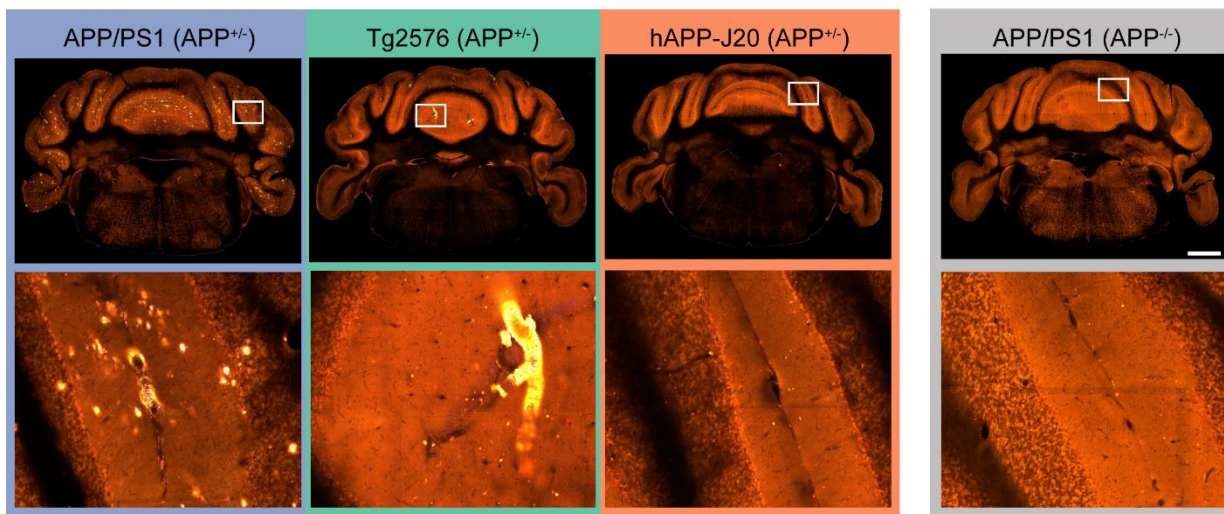

1054

1055 **Figure 7. APP/PS1 and Tg2576 mice have plaques in the cerebellum but hAPP-J20 mice do not.**  
1056 Single STP image planes in the cerebellum (top row) and higher magnification views of the region  
1057 indicated with the white box (bottom row). All images are from 19-month-old mouse brains. Scale = 1 mm.



Figure 8. Plaques are unequally distributed across structural modules in the isocortex.

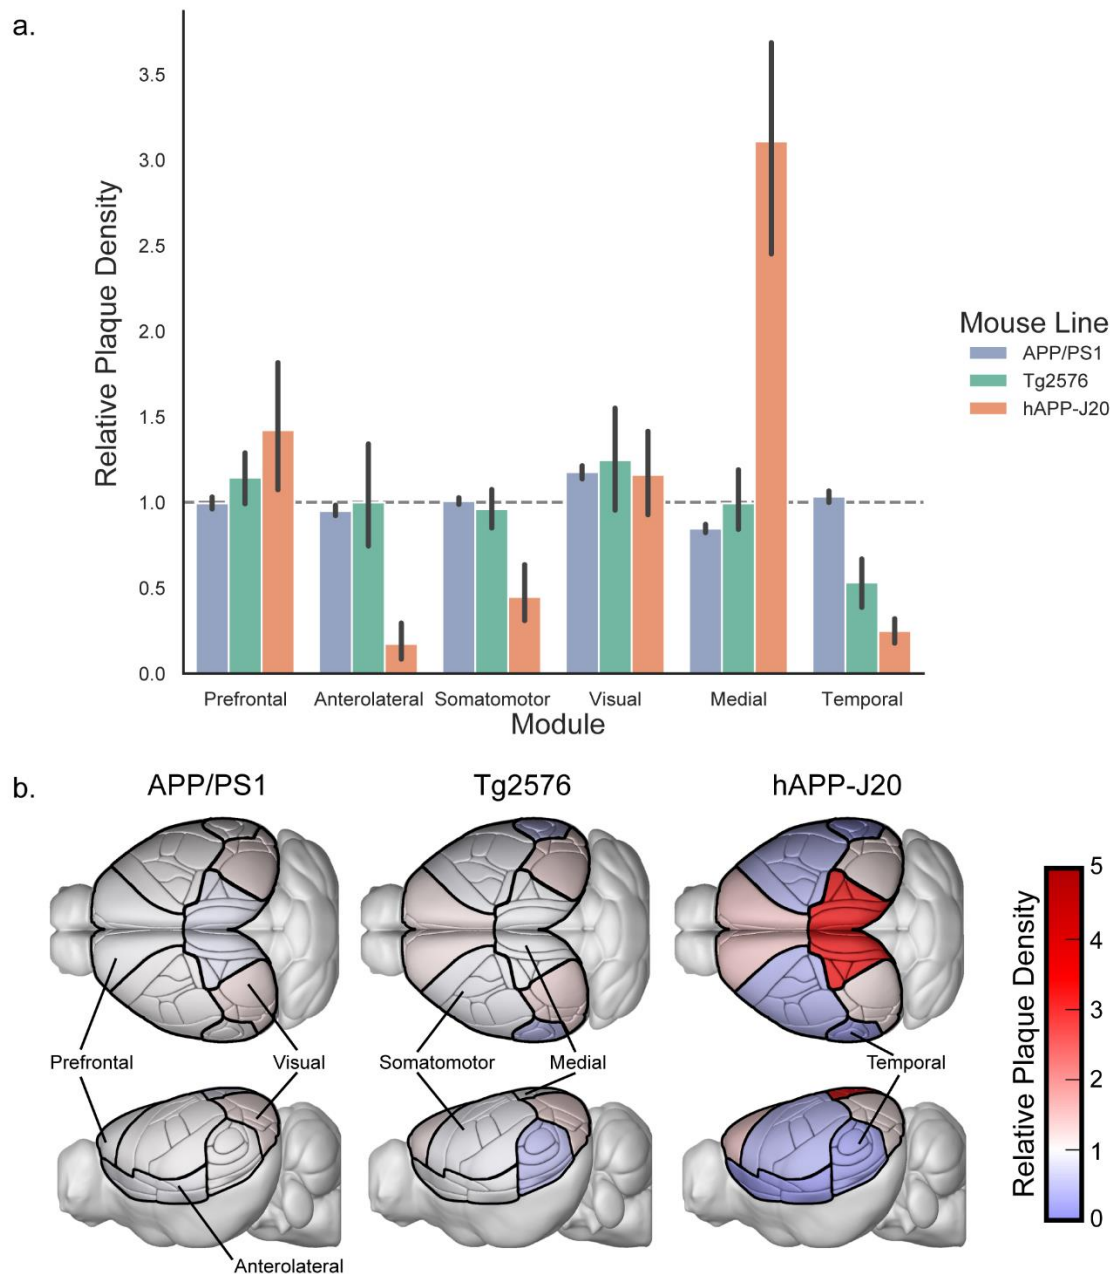

1058

1059 **Figure 8. Plaques are unequally distributed across structural modules in the isocortex. (a).** Plaque  
 1060 density in the isocortex modules from (Harris et al., 2018) relative to the density that would be expected  
 1061 with even plaque distribution across all cortical regions (dashed gray line). Error bars indicate the 95%  
 1062 confidence interval. **(b).** Illustrations of the Allen CCFv3 with isocortex structures colored by the relative  
 1063 plaque density of their corresponding module in each mouse line.

Figure 9. Heatmaps showing the anatomical distribution of plaques in three APP mouse lines.

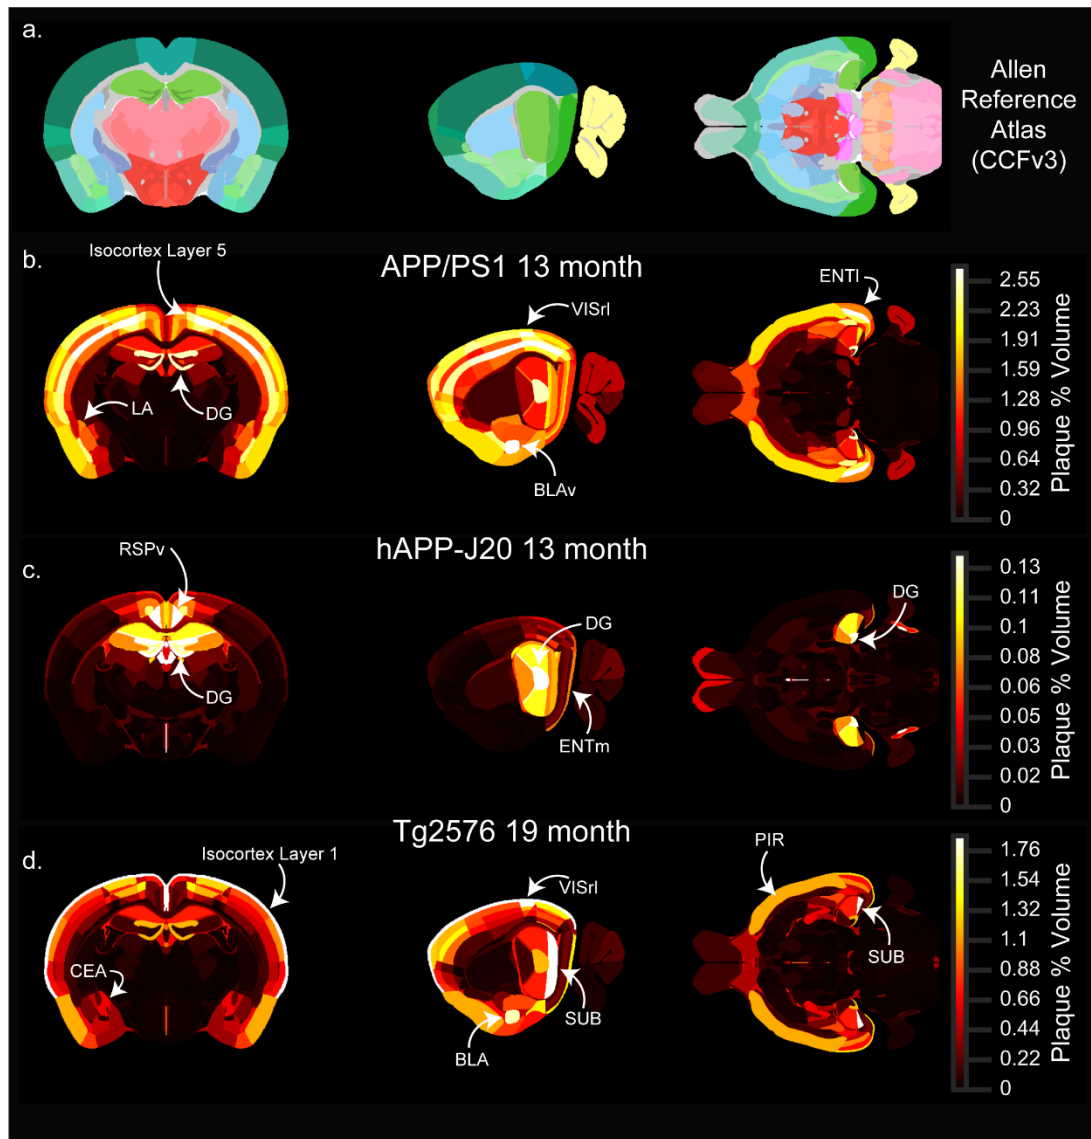

1064  
1065  
1066  
1067  
1068  
1069  
1070  
1071  
1072  
1073  
1074  
1075  
1076

**Figure 9. Whole brain 3D heatmaps showing the anatomical distribution of plaques.** Single coronal (left), sagittal (middle), and horizontal (right) planar views from the associated full 3D map for each age-mouse line combination. **(a)** Sections from the Allen CCFv3 reference atlas showing structure annotation at the summary structure level. **(b-d)** Single sections corresponding to the reference atlas plates in the top row colored by plaque density. APP/PS1 **(b)** and hAPP-J20 **(c)** maps for 13-month-old animals are shown, and the Tg2576 **(d)** map is for 19-month-old animals. Each plaque map has its own scaled colormap (indicated in color bar on right) since absolute plaque levels are variable between ages and mouse lines. The full 3D plaque maps for all ages and mouse lines are available to download as nrrd files online at [link to be provided]. Abbreviations: LA: Lateral amygdalar nucleus, DG: dentate gyrus, VISrl: rostrolateral visual area, BLAv: Basolateral amygdalar nucleus, ventral part, ENTl: lateral entorhinal cortex, RSPv: ventral retrosplenial cortex, ENTm: medial entorhinal cortex, CEA: Central amygdalar nucleus, SUB: subiculum, BLA: Basolateral amygdala, PIR: Piriform cortex.

Figure 10. Heatmaps showing the anatomical distribution of plaques in three APP mouse lines.

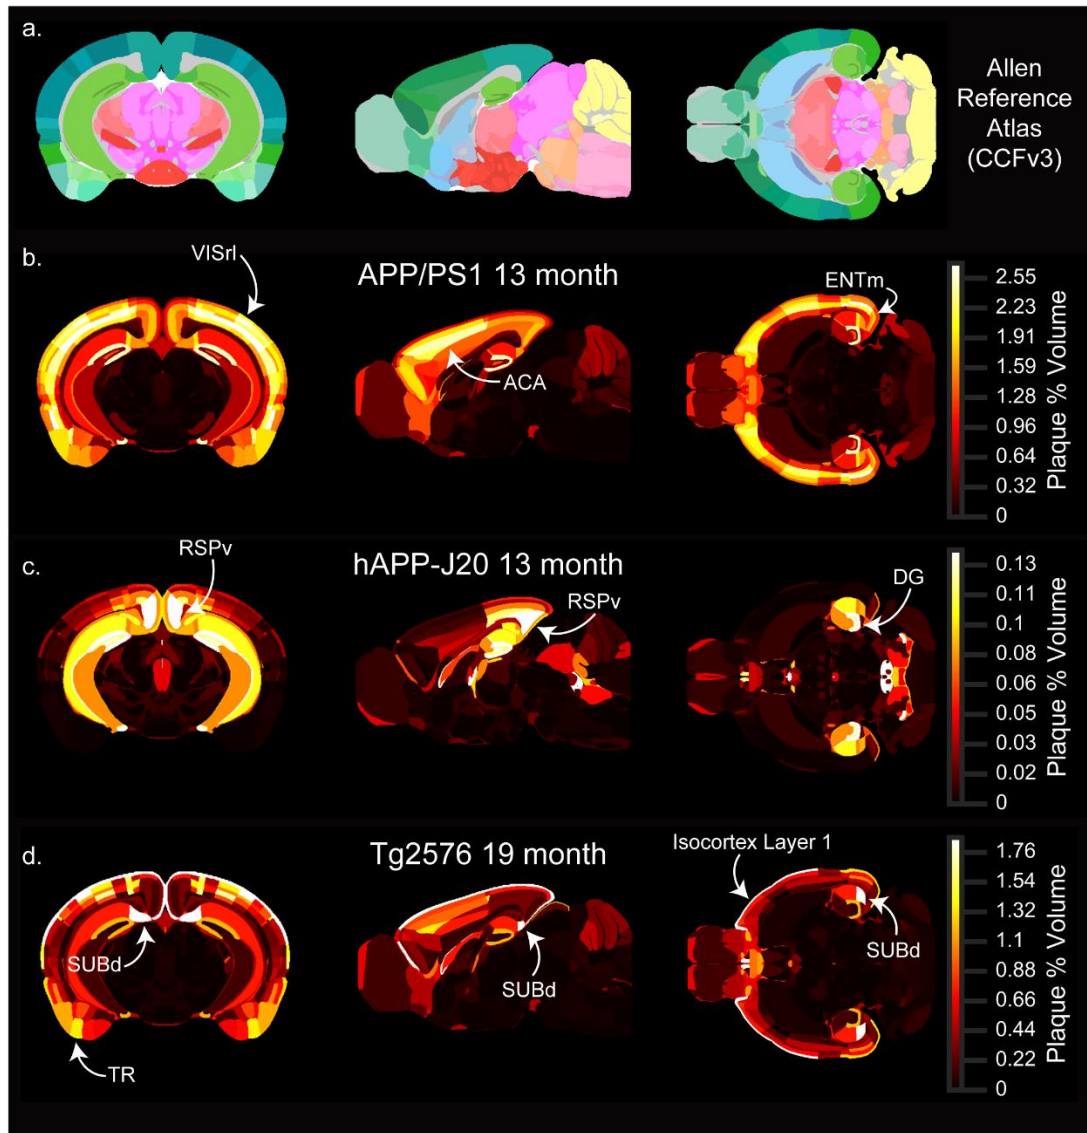

1077  
1078 **Figure 10. Whole brain 3D heatmaps showing the anatomical distribution of plaques at other**  
1079 **locations.** (Single coronal (left), sagittal (middle), and horizontal (right) planar views from the associated  
1080 full 3D map for each age-mouse line combination. **(a)** Sections from the Allen CCFv3 reference atlas  
1081 showing structure annotation at the summary structure level. **(b-d)** Single sections corresponding to the  
1082 reference atlas plates in the top row colored by plaque density. APP/PS1 **(b)** and hAPP-J20 **(c)** maps for  
1083 13-month-old animals are shown, and the Tg2576 **(d)** map is for 19-month-old animals. Each plaque map  
1084 has its own scaled colormap (indicated in color bar on right) since absolute plaque levels are variable  
1085 between ages and mouse lines. The full 3D plaque maps for all ages and mouse lines are available to  
1086 download as nrrd files online at [link to be provided]. Abbreviations: VISrl: rostralateral visual area, ACA:  
1087 anterior cingulate cortex, ENTm: medial entorhinal cortex, RSPv: ventral retrosplenial cortex, DG: dentate  
1088 gyrus, SUBd: dorsal subiculum, TR: Postpiriform transition area.

Figure 11. Plaque distribution across cortical layers differs between mouse lines

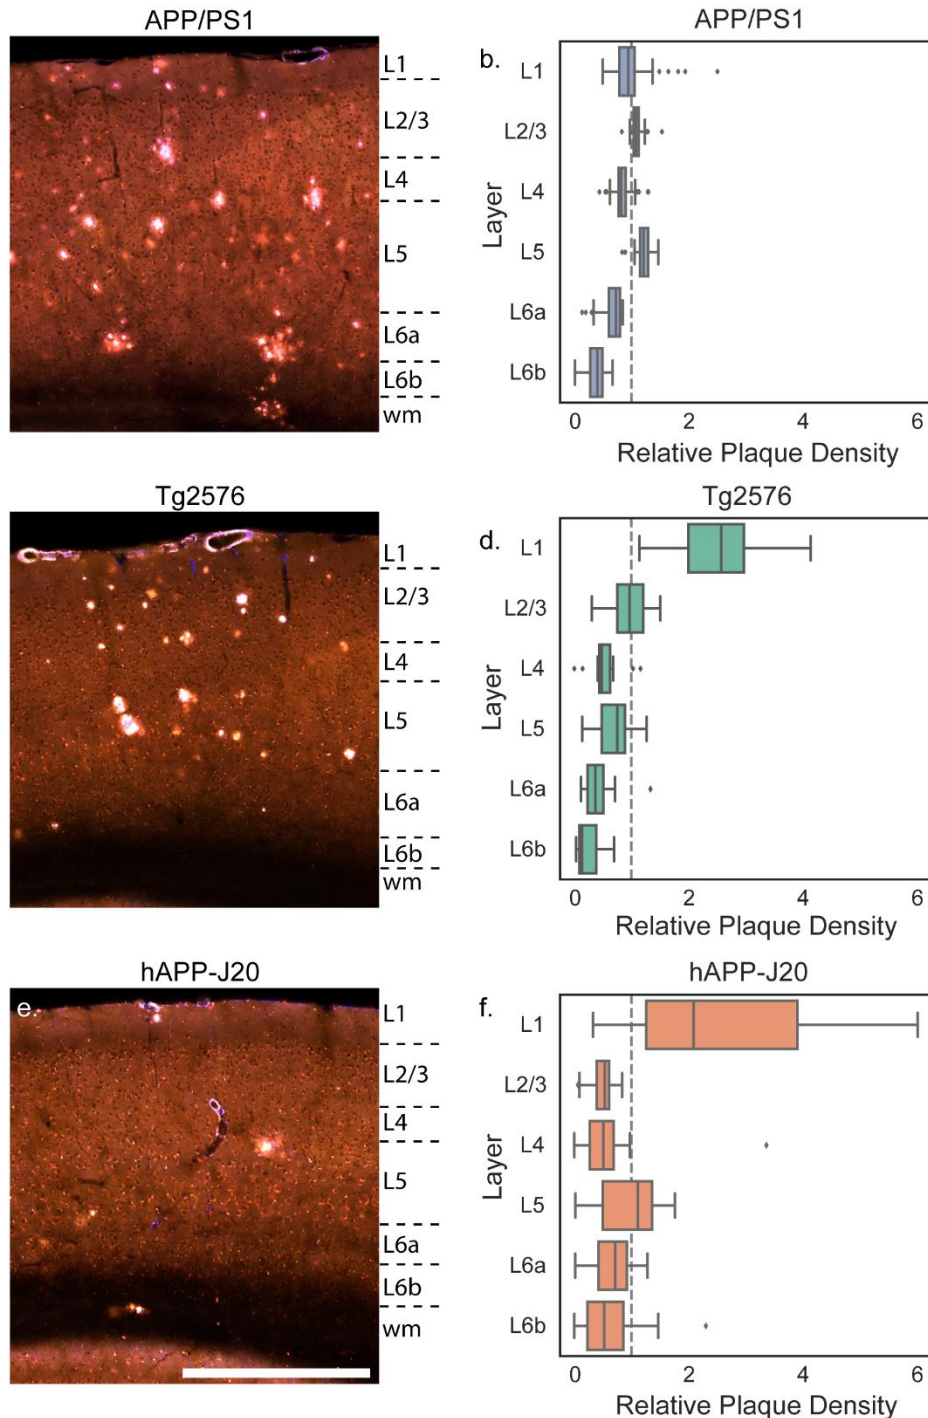

1089  
1090  
1091  
1092  
1093  
1094  
1095

**Figure 11. Plaque distribution across cortical layers differs between mouse lines.** Images showing plaques in the parietal cortex of 19-month-old APP/PS1 (a), Tg2576 (b), and hAPP-J20 (c) mice. Approximate layer boundaries are indicated in text to the right of each image (wm = white matter). Scale = 500  $\mu$ m. The relative plaque density in each cortical layer across the entire isocortex is plotted separately for APP/PS1 (b), Tg2576 (d), and hAPP-J20 (f) mouse lines. Box plots show median and IQR with whiskers extending up to 1.5 times the IQR. Outliers are plotted as individual points.

Figure 12. Brain-wide temporal patterns of plaque distribution in APP/PS1 and Tg2576 mice are similar to the pattern of A $\beta$  deposition in human AD brains.

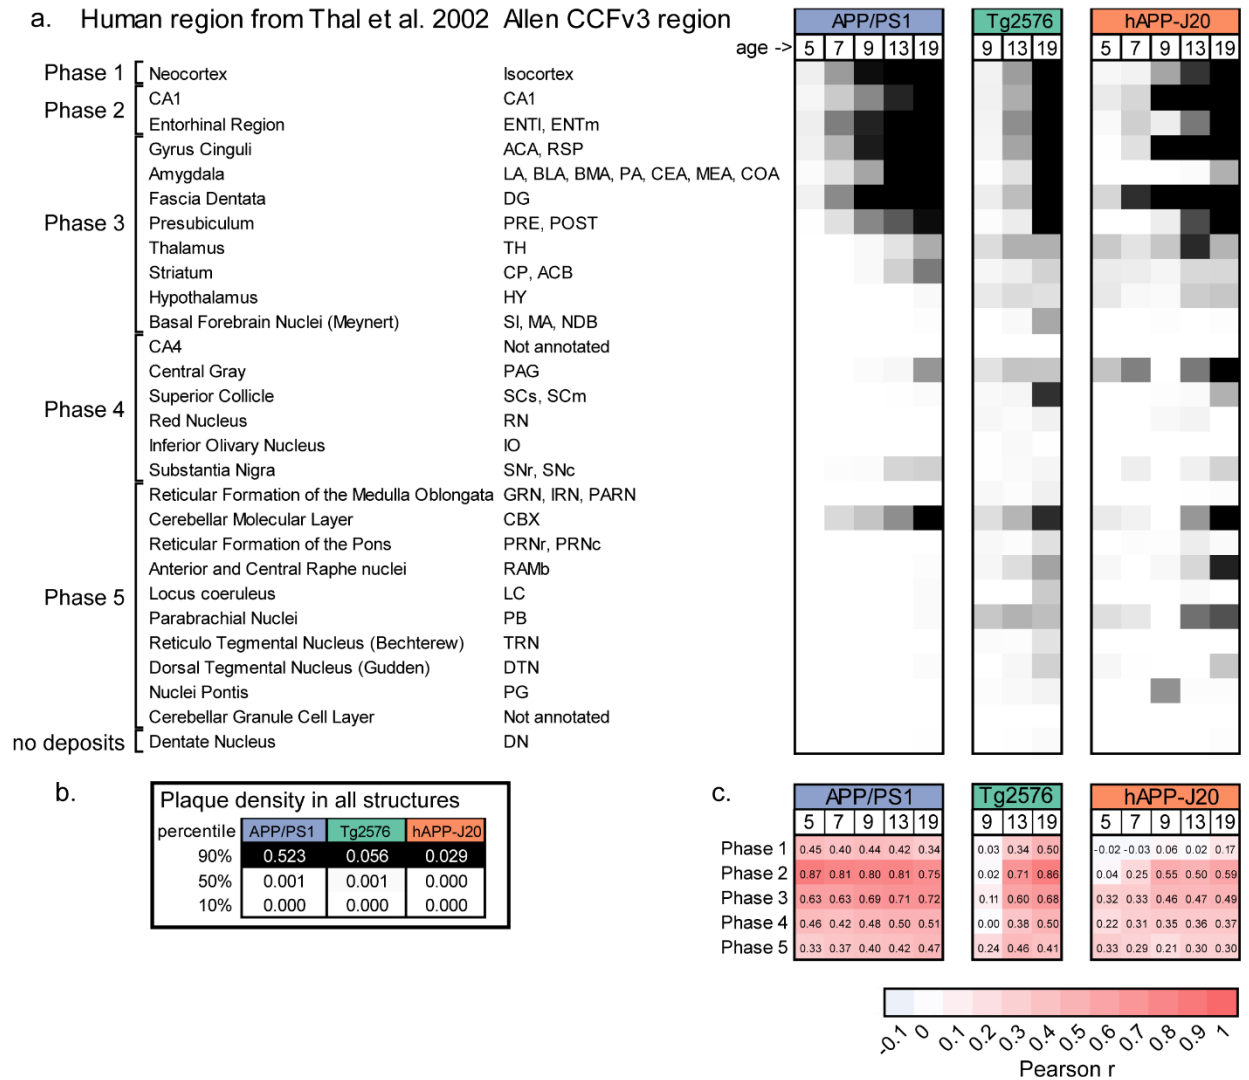

1096

1097 **Figure 12. Brain-wide spatial-temporal patterns of plaque deposition in APP/PS1 and Tg2576 mice**

1098 **is most similar to the pattern seen in human patients with AD progression. (a)** Comparison of

1099 relative plaque density in similar structures between human autopsy tissue and APP mouse models.

1100 Human brain regions where A $\beta$  pathology was quantified by Thal et al. (2012) are listed in the left column

1101 and the corresponding region(s) from the Allen CCFv3 reference atlas are listed in the second column.

1102 Plaque density (or median plaque density where there are multiple regions) for each age group and

1103 mouse line is indicated by the heatmap in the columns to the right. The colormap spans from the 10<sup>th</sup>

1104 percentile to the 90<sup>th</sup> percentile of the plaque density for **all** structures at all ages in that mouse line. **(b)**

1105 10%, 50%, and 95% values for each mouse line. **(c)** Similarity measured using the Pearson correlation

1106 coefficient for comparisons between plaque density in each mouse line and age group with the fraction of

1107 patients showing plaques in each region during the five Phases of A $\beta$  deposition in patients.

1108 Abbreviations: ENTl: Entorhinal area, lateral part; ENTm: Entorhinal area, medial part, dorsal zone; ACA:

1109 Anterior cingulate area; RSP: Retrosplenial area; LA: Lateral Amygdalar nucleus; BLA: Basolateral

1110 amygdalar nucleus; BMA: Basomedial amygdalar nucleus; PA: Posterior amygdalar nucleus; CEA:

1111 Central amygdalar nucleus; MEA: Medial amygdalar nucleus; COA: Cortical amygdalar area; DG: Dentate

1112 gyrus; PRE: Presubiculum; POST: Postsubiculum; TH: Thalamus; CP: Caudoputamen; ACB: Nucleus

1113 accumbens; HY: Hypothalamus; SI: Substantia innominata; MA: Magnocellular nucleus; NDB: Diagonal

1114 band nucleus; PAG: Periaqueductal gray; SCs: Superior colliculus, sensory related; SCm: Superior  
1115 colliculus, motor related, RN: Red nucleus; IO: Inferior olivary complex; Substantia nigra, reticular part;  
1116 SNc: Substantia nigra, compact part; GRN: Gigantocellular reticular nucleus; IRN: Intermediate reticular  
1117 nucleus; PARN: Parvicellular reticular nucleus; CBX: Cerebellar cortex; PRNr: Pontine reticular nucleus;  
1118 PRNc: Pontine reticular nucleus, caudal part; RAmb: Midbrain raphe nuclei; LC: Locus ceruleus; PB:  
1119 Parabrachial nucleus; DN: Dentate nucleus.

1120 **Movie 1.** Plaque maps for 13-month-old APP/PS1, 19-month-old Tg2576, and 13-month-old hAPP-J20  
1121 mouse lines. Each frame of the movie shows a coronal section from the Allen CCFv3 reference atlas with  
1122 structures colored by plaque density (percent of structure volume occupied by plaque).

1123 **Appendix 1. False positive values for all structures in the Allen CCFv3 reference atlas.** False  
1124 positive plaque signal detected in APP<sup>-/-</sup> control brains by our automated informatics pipeline. For each  
1125 structure annotated in the Allen CCFv3 reference atlas, we list the structure acronym, unique structure id,  
1126 plaque volume (volume of structure covered by plaque signal), structure volume (total volume of each  
1127 structure in mm<sup>3</sup>), plaque density (plaque volume/structure volume, or fraction of structure area covered  
1128 by plaque signal), plaque count (number of plaques in each structure), plaque count per mm<sup>3</sup> (plaque  
1129 count/structure volume). Values in this table are the mean for all control animals.

1130 **Appendix 2. Plaque volume, density, and count for all structures in all animals.** For each animal in  
1131 our dataset, this table lists the unique image series id, mouse line, sex, age at death (age), and age group  
1132 (5 mo, 7 mo, 9 mo, 13 mo, 19 mo). The “control” column indicates mice from the control dataset (TRUE =  
1133 APP<sup>-/-</sup> control, FALSE = experimental animal). Each tab contains data for all 839 structures in the Allen  
1134 CCFv3 with different tabs corresponding different metrics: plaque volume (volume of structure covered by  
1135 plaque signal), plaque density (plaque volume/structure volume), plaque count (number of plaques in  
1136 each structure), plaques per mm<sup>3</sup> (plaque count/structure volume), and structure volume (which can vary  
1137 slightly between experiments due to imaging artifacts).
